1 **Title: Involvement of an IgE/Mast cell/B cell amplification loop in**  
2 **abdominal aortic aneurysm progression**

3  
4 **Authors:** Alexia Loste, PhD, <sup>a,b</sup>, Marc Clément, PhD, <sup>a,b</sup>, Sandrine Delbosc, PhD, <sup>a,b</sup>, Kevin  
5 Guedj, PhD, <sup>a,b</sup>, Jean Sénémaud, MD, <sup>a,b,c</sup>, Anh-Thu Gaston, BS, <sup>a,b</sup>, Marion Morvan, BS, <sup>a,b</sup>,  
6 Guillaume Even, BS, <sup>a,b</sup>, Grégory Gautier, PhD, <sup>b,d</sup>, Alexander Eggel, PhD, <sup>e</sup>, Michel Arock,  
7 PharmD, PhD, <sup>f</sup>, Emanuele Procopio, MS, <sup>a,b</sup>, Catherine Deschildre, BS, <sup>a,b</sup>, Liliane Louedec,  
8 BS, <sup>a,b</sup>, Jean-Baptiste Michel, MD, PhD <sup>a,b</sup>, Lydia Deschamps, MD, PhD <sup>g</sup>, Yves Castier, MD,  
9 PhD, <sup>c</sup>, Raphaël Coscas, MD, PhD, <sup>a,h</sup>, Jean-Marc Alsac, MD, PhD, <sup>i</sup>, Pierre Launay, PhD, <sup>b,d</sup>,  
10 Giuseppina Caligiuri, MD, PhD, <sup>a,b,j</sup>, Antonino Nicoletti, PhD, <sup>a,b</sup>, Marie Le Borgne, PhD, <sup>a,b</sup>.

11  
12 **Affiliations:**

13 <sup>a</sup> Université Paris Cité and Université Sorbonne Paris Nord, INSERM, LVTS, F-75018 Paris,  
14 France.

15 <sup>b</sup> DHU FIRE, Paris, France.

16 <sup>c</sup> Department of Vascular and Thoracic Surgery, AP-HP, Bichat Hospital, Université Paris Cité,  
17 Paris, France.

18 <sup>d</sup> INSERM UMRS 1149, Centre de Recherche sur l'Inflammation (CRI), Université Paris Cité,  
19 Paris, France.

20 <sup>e</sup> Department for BioMedical Research, University of Bern, Bern, Switzerland.

21 <sup>f</sup> Department of Biology and CNRS UMR8113, Ecole Normale Supérieure de Paris-Saclay,  
22 Saclay, France.

23 <sup>g</sup> Department of Pathology, AP-HP, Bichat Hospital, Université Paris Cité, Paris, France.

1 <sup>h</sup> Department of Vascular Surgery, AP-HP, Ambroise Paré University Hospital, Université  
2 Paris Cité, Boulogne-Billancourt, France.

3 <sup>i</sup> Department of Vascular Surgery, AP-HP, Hôpital Européen Georges Pompidou, Université  
4 Paris Cité, Paris, France.

5 <sup>j</sup> Department of Cardiology, AP-HP, Bichat Hospital, Université Paris Cité, Paris, France.

6

7 **Address for correspondence:**

8 Marie Le Borgne

9 LVTS INSERM U1148, 46 rue Henri Huchard, 75018 Paris, France

10 Tel: +33 1 40 25 75 51; fax: +33 1 40 25 86 02; e-mail: [marie.le-borgne-moynier@inserm.fr](mailto:marie.le-borgne-moynier@inserm.fr)

11

## 1 **Abstract**

2

3 IgE type immunoglobulins and their specific effector cells, mast cells (MCs), are associated  
4 with abdominal aortic aneurysm (AAA) progression. In parallel, immunoglobulin-producing B  
5 cells, organised in tertiary lymphoid organs (TLOs) within the aortic wall, have also been linked  
6 to aneurysmal progression. We aimed at investigating the potential role and mechanism linking  
7 local MCs, TLO B cells, and IgE production in aneurysmal progression.

8 Through histological assays conducted on human surgical samples from AAA patients, we  
9 uncovered that activated MCs were enriched at sites of unhealed haematomas, due to  
10 subclinical aortic wall fissuring, in close proximity to adventitial IgE<sup>+</sup> TLO B cells.  
11 Remarkably, *in vitro* the IgEs deriving from these samples enhanced MC production of IL-4, a  
12 cytokine which favors IgE class-switching and production by B cells. Finally, the role of MCs  
13 in aneurysmal progression was further analysed *in vivo* in ApoE<sup>-/-</sup> mice subjected to angiotensin  
14 II infusion aneurysm model, through MC-specific depletion after the establishment of  
15 dissecting aneurysms. MC-specific depletion improved intramural haematoma healing and  
16 reduced aneurysmal progression.

17 Our data suggest that MC located close to aortic wall fissures are activated by adventitial TLO  
18 B cell-produced IgEs and participate to their own activation by providing support for further  
19 IgE synthesis through IL-4 production. By preventing prompt repair of aortic subclinical  
20 fissures, such a runaway MC activation loop could precipitate aneurysmal progression,  
21 suggesting that MC-targeting treatments may represent an interesting adjunctive therapy for  
22 reducing AAA progression.

23 **Keywords:** Abdominal aortic aneurysm, mast cells, IgE antibodies, tertiary lymphoid organs,  
24 B lymphocytes, aortic dissection.

## 1 **Abbreviations**

- 2 AAA = abdominal aortic aneurysm; AngII = Angiotensin II; ApoE = apolipoprotein E; DT =
- 3 diphtheria toxin; MC = mast cell; NAA = non-aneurysmal aortas; RMB = red mast cells and
- 4 basophil; TLO = tertiary lymphoid organ.

## 1 **Introduction**

2 Arteries are subjected to recurrent mechanical insults which rise from the luminal side of  
3 vessels (Caligiuri et al., 2019). Vessels have intrinsic capacities to ensure prompt healing of  
4 local injuries and are assisted in this task by resident and recruited inflammatory cells (Dutertre  
5 et al., 2014). However, the persistence of vascular inflammation can eventually amplify the  
6 arterial damage and lead to severe and life-threatening conditions including coronary artery  
7 disease, strokes or abdominal aortic aneurysms (AAAs) (Libby et al., 2018). Promoting arterial  
8 healing by targeting inflammation thus constitutes a major challenge in modern medicine.

9 In this study, we focused on AAA progression. Monitoring AAA enlargement is problematic  
10 due to the discontinuous, so-called 'staccato' growth where month-lasting no-growth/healing  
11 periods can be succeeded by a sudden enlargement and again a no-growth/healing period  
12 (Kurvers et al., 2004). So far, no pharmacological treatments have been identified to reduce or  
13 stop AAA expansion and subsequent arterial rupture, which causes up to 200,000 deaths  
14 worldwide each year (Sakalihasan et al., 2018). The only therapeutic option when the aneurysm  
15 diameter exceeds a certain value (55mm in men, 50mm in women) is aorta surgery. Therefore,  
16 deciphering the molecular pathways involved in AAA healing and/or progression is essential  
17 to set up pharmacological alternatives.

18 Chronic immune responses involve adaptive and innate immunity and their relationship. In  
19 particular, we and others have observed that chronic immune stimulation in AAAs leads to local  
20 tertiary lymphoid organ (TLO) development within the adventitia (Clement et al., 2015; Guedj  
21 et al., 2014; Mohanta et al., 2014; Nicoletti et al., 2013). TLOs contain germinal centre B cells  
22 corresponding to B cells undergoing differentiation into plasma cells (Clement et al., 2015).  
23 We have reported that TLO development is associated with increased levels of antibodies in  
24 the adventitia of human AAAs, in particular IgEs (Clement et al., 2015), which are also

1 involved in chronic inflammation. Notably, increase in IgE blood concentration correlates with  
2 the progression of AAAs and other arterial diseases (Guo et al., 2016; Tuleta et al., 2017). These  
3 observations raised the possibility that IgEs are produced locally within the arterial wall.

4 In parallel, triggered by the binding of IgE at their surface, activated mast cells (MCs) release  
5 potent proteases, cytokines and vasoactive molecules, such as leukotriene and histamine,  
6 directly or indirectly favouring the detersion of the extracellular matrix and a massive loss of  
7 the contingent of medial smooth muscle cells, that could eventually lead to aneurysmal  
8 expansion (Sun et al., 2007; Sun et al., 2009; Swedenborg et al., 2011). Interestingly, MC  
9 number increases in diseased arteries (Kaartinen et al., 1994; Tsuruda et al., 2008).  
10 Furthermore, MCs can promote B cell effector functions (Merluzzi et al., 2010). As a  
11 consequence, MCs have been surmised to be detrimental in AAAs (Furubayashi et al., 2007;  
12 Sun et al., 2007; Sun et al., 2009). Studies aiming at inhibiting MC activation with pemirolast,  
13 a histamine H1 antagonist, were inconclusive regarding their effect on AAA reduction (Sillesen  
14 et al., 2015). However, pemirolast cannot uncouple IgE-mediated effector processes, which are  
15 by far the most potent and specific trigger of MC activation. Hence, to date, the role of MCs in  
16 aneurysmal progression remains elusive.

17 Here, we aimed at investigating the potential mechanism linking MC activity to IgEs and TLO  
18 B cell in aneurysmal progression. To do so, we performed histological and *in vitro* assays using  
19 human surgical samples from AAA patients. Furthermore, the putative pathogenic role of MCs  
20 in aneurysmal growth was evaluated *in vivo*, by inducing MC depletion in Red Mast cell and  
21 Basophil (RMB) - ApoE<sup>-/-</sup> mice subjected to angiotensin II infusion during the phase of  
22 aneurysm progression.

## 1 **Results**

### 2 **IgE producing-TLOs are associated with aneurysmal wall unhealed fissures in** 3 **patients**

4 Tissue infiltrated IgE were enriched in aneurysmal samples and soluble IgE plasma levels were  
5 elevated in AAA patients compared to control non-aneurysmal aortas (NAAs, Figure 1–figure  
6 supplement 1). In parallel, TLOs were found in a majority of AAA samples (20 out of 25,  
7 Figure 1A) whereas they were absent in all NAA, in agreement with previous findings (Clement  
8 et al., 2015; Guedj et al., 2014; Mohanta et al., 2014; Nicoletti et al., 2013). In particular,  
9 adventitial TLOs were consistently found in samples from patients with larger aneurysms  
10 (Figure 1B), suggesting their higher frequency in these patients. In these adventitial TLOs, the  
11 proportion of germinal centre B cells was dramatically increased (Figure 1–figure supplement  
12 2), suggesting that adventitial TLO B cells in large aneurysms are engaged into an Ab-  
13 producing program from which diverse Ig isotypes could emerge. Interestingly, we observed a  
14 strong staining for IgEs within the TLO “light zone” (where the centrocytes, i.e. B cells  
15 differentiating in immunoglobulins-producing cells, are located (Pipi et al., 2018); Figure 1A)  
16 in 45% (n=9) of the samples. Altogether these results suggest that germinal centre B cells within  
17 adventitial TLOs situated within large AAAs may actively produce IgE immunoglobulins.

18 Intriguingly, combined histological analysis of Carstairs’, Perl’s + DAB and Orcein staining  
19 revealed the presence of recent or past wall fissuring with haematoma formation in the media  
20 in 92% AAA samples (Figure 1C, Figure 1–figure supplement 3, and Table 1). Indeed, 84% of  
21 total AAA tissues (n=21) presented an accumulation of red blood cells (Figure 1C), reflecting  
22 the recent occurrence of intramural haematomas. Of note, the diameter of the aneurysmal  
23 samples was significantly larger than 3 cm, implying a greater tension and mechanical stress,  
24 than the one of the non-aneurysmal aortas (diameter < 3 cm) (Sakalihasan et al., 2018) and an

1 attentive evaluation of pre-surgery tomography angiograms consistently revealed the presence  
2 of at least one detectable aneurysmal wall macroscopic fissure, with radiologic contrast  
3 penetrating *via* blood disruptions from the aortic lumen to the aortic wall through the  
4 intraluminal thrombus, in 78% of patients with intramural haematomas (Figure 1D and Figure  
5 1–figure supplement 3D). In some samples, we were able to observe the entry site of blood  
6 from the lumen on AAA histological sections, suggesting that the fissures leading to intramural  
7 haematomas were provoked by tears (micro-fissures) initiated from the aorta lumen (Figure 1–  
8 figure supplement 4A-B and 4D-E). Unhealed intramural haematomas could also be evidenced  
9 as large areas of ferrous iron deposits next to modest red blood cell accumulation in the media  
10 (Figure 1–figure supplement 3B) in 8% (n=2) of samples. Importantly, IgE<sup>+</sup> TLOs were  
11 frequently localized near these intramural haematomas (Figure 2A-C), suggesting that the  
12 maturation of B cells towards IgE-producing cells within adventitial TLOs and the occurrence  
13 of micro-fissures are linked.

14

## 15 **MCs are enriched at sites of aneurysmal wall fissures and IgE-producing TLOs in** 16 **human AAAs**

17 In parallel, we observed that the adventitia of AAA patients was significantly enriched in MCs  
18 compared to the adventitia of NAA organ donors (Figure 2E-F and Figure 2–figure supplement  
19 1), in agreement with previous observations (Tsuruda et al., 2008). Moreover, MCs were often  
20 located next to IgE<sup>+</sup> TLOs (Figure 2B-C), and extracellular tryptase<sup>+</sup> granules reflecting recent  
21 MC activation could be observed around these MCs by immunostaining on AAA sections  
22 (Figure 2G-H). Indeed, as compared to NAA samples, adventitial MCs in AAA samples were  
23 degranulating, as documented by the expression of the degranulation/MC activation marker  
24 CD107a analysed by flow cytometry (Figure 2E-F). Strikingly, MCs enriched in AAA tissues



1 were consistently found at sites of haematomas on AAA sections (Figure 2D and Figure 1–  
2 figure supplement 4C and 4F) where their granule enzymes could favour arterial wall rupture.  
3 Altogether, these results suggest that MCs and IgE<sup>+</sup> TLOs could concur and be linked together  
4 with the occurrence of arterial wall injuries and aneurysmal progression.

5

### 6 **Soluble molecules from human AAA adventitia induce MC degranulation and IgE-** 7 **dependent production of IL-4**

8 Given that MCs displayed an activated phenotype only in the adventitia of AAA patients  
9 (Figure 2), we assessed the putative presence of MC activation triggers in the conditioned  
10 medium prepared from the adventitia of AAA as compared to control NAA tissues. We  
11 observed that conditioned medium from AAA adventitias induced more surface expression of  
12 the degranulating marker CD63 and more IL-4 mRNA transcription than conditioned medium  
13 from NAA adventitia in cultured ROSA human MCs (Figure 3A-B). This is important because  
14 the cytokine IL-4 is required to carry out an IgE antibody class switch recombination and hence  
15 allow the production of IgE by B cells (Saunders et al., 2019). Therefore, these results point at  
16 an unforeseen function of MCs in AAAs, whereby MCs could orientate the local adaptive  
17 immune response generated in adventitial TLOs toward IgE production. In turn, the binding of  
18 adventitial IgE on their high affinity receptor on MCs could be responsible for triggering MC  
19 activation. To directly assess this hypothesis, we pre-incubated the conditioned medium with  
20 anti-IgE DARPin<sup>®</sup> protein bi53\_79 (5  $\mu$ M) before adding it to MCs (Figure 3C-D). DARPin<sup>®</sup>  
21 protein bi53\_79 is a soluble molecule that specifically binds to the IgE-Fc portion thereby  
22 preventing IgE binding to Fc $\epsilon$ RI (Eggel et al., 2014). Whereas treatment of conditioned medium  
23 with bi53\_79 did not prevent MC degranulation (Figure 3C), it decreased IL-4 mRNA  
24 production compared to untreated conditioned medium from AAA tissues (Figure 3D). IgEs

1 contained in the conditioned medium from AAA adventitias therefore emerge as instrumental  
2 in promoting MC IL-4 production.

3 To assess if IL-4 production, MCs, and IgEs are also linked *in vivo*, we measured IgE, tryptase,  
4 and IL-4 quantities in the conditioned medium from AAA adventitias. We found a statistically  
5 significant positive correlation between the concentration of IgEs and IL-4 ( $p < 0.001$ ), as well  
6 as between the concentration of IL-4 and tryptase ( $p < 0.05$ , Figure 3E-F). No such correlations  
7 were observed in the plasma of paired patients (Figure 3–figure supplement 1). These  
8 observations support the existence of a local amplification loop in the adventitia of AAAs  
9 involving IL-4 producing MCs and IgE-producing B cells.

10

### 11 **MCs aggravates aneurysmal progression in mice**

12 Previous studies have identified MCs as directly involved in provoking arterial damage  
13 (Furubayashi et al., 2007; Sun et al., 2007; Sun et al., 2009). Consistently, the presence of  
14 medial/adventitial MCs with an activated phenotype was associated to micro-fissures in our  
15 human AAA samples, suggesting that MCs could play a role in the aneurysmal remodelling of  
16 the aortic wall, upon the occurrence of tissue fissuring. Therefore, we asked whether specific  
17 depletion of MCs could prevent the aneurysmal remodelling in ApoE<sup>-/-</sup> mice subjected to  
18 chronic infusion of Angiotensin II (AngII), a well-known mouse model of aortic dissection  
19 eventually followed by aneurysmal progression (Saraff et al., 2003). In this setting,  
20 pseudoaneurysm of the abdominal aorta starts within 10 days upon the formation of large  
21 intramural haematomas due to the occurrence of multiple medial tears originating from the  
22 lumen, at the origin of the main side branches (Trachet et al., 2017). In order to conditionally  
23 induce specific MC depletion by DT injection after the occurrence of the aortic fissuring, we  
24 crossed ApoE<sup>-/-</sup> mice with RMB mice (ApoE-RMB mice) (Dahdah et al., 2014). ApoE-RMB

1 mice were subjected to infusion with AngII for 28 days. We injected DT (or PBS as a control)  
2 14 days after the beginning of AngII infusion. Thus, MCs were depleted after the occurrence  
3 of the dissection in this model (Saraff et al., 2003), allowing to evaluate the effect of their  
4 depletion on the remodelling of the dissected aortas and their potential effect on aneurysmal  
5 progression 14 days later (Figure 4A).

6 Survival was similar in the two groups (Table 2). As anticipated, the proportion of mice  
7 presenting an intramural haematoma at day 28 was equivalent in DT-treated mice (44%, n=  
8 8/18) and in the control group (47%, n=7/17). DT injection almost completely depleted MCs  
9 from the aortic tissue (Figure 4B-C) and the peritoneal cavity (Figure 4–figure supplement 1).

10 MC depletion reduced the expansion of the pseudoaneurysm (Figure 4D-F), comprising the  
11 size of the intramural haematoma and of the perivascular adventitial cuff (Figure 4–figure  
12 supplement 2A-C). Furthermore, on the cross-sections of the dissected aorta segments stained  
13 with picrosirius red we observed that the aortic wall of the pseudoaneurysm of DT-treated mice  
14 presented an increased density of collagen compared to control mice (Figure 4E and 4G),  
15 especially in the adventitial fibrous cuff (Figure 4–figure supplement 2D). Our data therefore  
16 show that MC depletion improves the adventitia fibrotic remodelling which is critical for  
17 providing an adequate stiffness and strength subsequently constraining the expansion of the  
18 haematoma and the reduction of the aneurysmal progression (McGloughlin, 2011).

19

## 1 **Discussion**

2 This study reveals the existence of a potential amplification loop involving IgE<sup>+</sup> TLO B cells  
3 and MCs at site of tissue fissuring, which could constitute an inflection point in AAA evolution,  
4 precipitating aneurysmal progression (Figure 5).

5 To our knowledge, this is the first time IgE<sup>+</sup> germinal centre B cells have been reported in  
6 TLOs. Indeed, while they appear early in primary immune responses, coinciding with the peak  
7 of IL-4 production, IgE<sup>+</sup> cells are unable to populate the long-lived B cell compartment, which  
8 explains why IgE<sup>+</sup> germinal centres are rarely seen in lymphoid organs (He et al., 2013). Our  
9 data show that the observed IgE<sup>+</sup> TLOs develop close to aortic wall fissures. Strikingly, the  
10 proximity of MCs and IgE<sup>+</sup> TLOs at site of tissue injury in the wall of progressive aneurysms  
11 supports a possible role for these highly reactive inflammatory cells in the progression of the  
12 disease and in the maintenance of the pathologic loop, through their production of IL-4 in  
13 response to locally produced IgEs, which in turn sustains the IgE<sup>+</sup> germinal centre cells in local  
14 TLOs. The correlation between IgE and IL-4 concentrations on one side, and IL-4 and tryptase  
15 concentrations on the other side strongly supports the putative interrelated activities of MCs  
16 and B cells. Furthermore, the ROSA human MC line is activated by purified IgEs only if these  
17 are cross-linked by an anti-IgE antibody (Saleh et al., 2014). Importantly, we did not induce  
18 such cross-linking with the conditioned medium. The fact that MCs were nonetheless activated  
19 in such experimental conditions implies that the IgEs contained in the conditioned medium  
20 were likely cross-linked by their cognate antigens. On the contrary, the fact that blood IgEs  
21 failed to activate MCs (data not shown) indicates that they were not circulating as immune  
22 complexes and hence strongly suggests that the antigen recognised by IgEs might be  
23 specifically present in the aneurysmal aorta. Locally produced IgEs may also directly contribute  
24 to AAA progression by promoting the senescence of smooth muscle cells (Guo et al., 2019).

1 Whereas MC IL-4 production was dependent on IgEs present in the conditioned medium from  
2 aneurysmal aorta, degranulation was not. This indicates that besides IgEs, other molecules from  
3 the adventitia stimulate MCs. Indeed, other classes of immunoglobulins, which are also  
4 enriched in aneurysmal aortas (Clement et al., 2015), cytokines, DAMP-containing molecules  
5 and inflammatory mediators released by the injured vascular stroma could also trigger MC  
6 degranulation. Further studies focusing on the relationship between IgEs and MC activation  
7 could lead to novel therapeutic strategies to reduce chronic inflammatory disorders.

8 Our pre-clinical *in vivo* data directly support a role for MCs in the fate of aneurysmal  
9 development of arterial wall subjected to fissuring and formation of an intramural haematoma.  
10 Importantly, for reaching this conclusion, we used the ApoE-RMB mouse model in which the  
11 depletion of MCs, conditioned by the use of DT, started only after the initial trigger (aortic  
12 dissection). Instead, the rodent models previously used to address this question were  
13 constitutively defective in MCs (Sun et al., 2007; Swedenborg et al., 2011; Tsuruda et al.,  
14 2008), implying that the deficiency of MCs preceded, and possibly biased, the experimental  
15 intervention itself. Furthermore, constitutive MC-deficient models such as *Kit<sup>W/W<sup>v</sup></sup>* and *Kit<sup>W-sh/W-  
16 sh</sup>* mice display other hematopoietic abnormalities, notably neutrophilia, thrombocytosis, and  
17 macrophage defects (Dahdah et al., 2014; Nigrovic et al., 2008) which could be responsible for  
18 some of the effects attributed to MCs. In addition, as resident MCs are present in healthy aortas,  
19 constitutive MC depletion could impact aorta homeostasis as well as the  
20 formation/progression/rupture of AAAs in these models. By triggering MC depletion after the  
21 occurrence of dissections in our ApoE<sup>-/-</sup> RMB mouse model, we were able to specifically tackle  
22 the role played by MCs during the healing processes associated with the progression of AAAs  
23 in this model. We found that AAAs in MC-depleted animals displayed improved arterial  
24 remodelling with an increased collagen content of the aneurysmal wall, supporting an active  
25 role for MCs in collagen degradation and expansion of AAA (Abdul-Hussien et al., 2007;

1 Dobrin et al., 1984). Mechanistically, MC chymase and tryptase could increase collagen  
2 degradation by converting collagenases from their inactive to their active form (Swedenborg et  
3 al., 2011). MCs could also inhibit the production of collagen by smooth muscle cells (Wang et  
4 al., 2001). Hence, MCs could actively contribute to weaken the arterial wall at sites of micro-  
5 fissures and favour the iterative expansion of aneurysms, under the biomechanic stress of  
6 intraluminal thrombus (Davis et al., 2019; Wilson et al., 2013). Furthermore, the unhealed  
7 micro-fissures could allow the accumulation of plasma proteins into the arterial wall, which is  
8 associated to AAA growth (Behr Andersen et al., 2018).

9 Importantly, the experimental setting we used here is similar to the clinical settings of a recently  
10 undertaken clinical trial investigating whether pemirolast, a histamine H1 antagonist acting as  
11 a MC stabilizer in allergic conditions, could retard the growth of medium-sized AAAs (Sillesen  
12 et al., 2015). This trial in which the major end-point was the change in aortic diameter as  
13 assessed by ultra-sound imaging, failed to report a significant improvement in the patients  
14 receiving the MC inhibitor. Although this study was elegantly designed and performed, it did  
15 not however bring a definitive conclusion regarding MC involvement in AAA pathophysiology  
16 because i/ the pemirolast treatment failed to decrease the plasma tryptase levels, indicating a  
17 critical dosing issue, ii/ the study interval might have been too short, and iii/ contrary to our  
18 study, the effect that MC inhibition might have exerted on tissue composition could not be  
19 studied in this clinical study. Hence, in light of our results, we believe it would be interesting  
20 to re-evaluate the effect of perimolast (and/or other MC-inhibiting drugs) on AAA growth and  
21 rupture rate by targeting patients presenting elevated levels of IgEs and focusing on adventitial  
22 remodelling. Inhibiting other key steps of the amplification loop, for instance by using anti-IgE  
23 antibodies, could be another promising therapeutic strategy for such patients.

24 Altogether, our data suggest that locally produced IgEs complexed with lesion-specific antigens  
25 activate MCs and trigger IL-4 production, which subsequently promote TLO B cell IgE class

- 1 switching. The runaway of this self-sustained local loop could drive repetitive MC
- 2 degranulation and thus constitute an inflection point in AAA evolution, preventing arterial
- 3 healing and precipitating AAA rupture (Figure 5).

## 1 **Materials and Methods**

### 2 **Mice**

3 Apolipoprotein E-deficient (ApoE<sup>-/-</sup>) mice (RRID:IMSR\_JAX:002052) were crossed to RMB  
4 (B6.Ms4a2<sup>tm1Mal</sup>) mice (Dahdah et al., 2014). RMB mice carry an additive transgene containing  
5 the promoter of the high affinity IgE receptor  $\beta$  subunit controlling the human diphtheria toxin  
6 (DT) receptor and the tomato red fluorescent protein (Dahdah et al., 2014). The heterozygous  
7 offspring were then intercrossed to generate homozygous ApoE<sup>-/-</sup> RMB mice. Mice were  
8 maintained on a C57Bl/6J background and fed a regular show diet. Induction of AAAs,  
9 histology and flow cytometry were performed as described below. All investigations on mice  
10 conformed to the Directive 2010/63/EU of the European Parliament, and review and approval  
11 of the study was obtained from the Comité d’Ethique Paris Nord #121 (APAFIS #12027).

### 12 **Human samples**

13 AAA tissues and blood were obtained from patients undergoing surgery and enrolled in the  
14 RESAA protocol (REflet Sanguin de l’évolutivité des Anévrismes de l’aorte abdominale)  
15 (Caligiuri et al., 2006). As expected (Sakalihasan et al., 2018), AAA patients were  
16 predominantly men, and presented risk factors such as age, hypertension, hyperlipidaemia and  
17 smoking (Table 3). All patients gave written informed consent, and the protocol was approved  
18 by the Comité Consultatif de Protection des Personnes dans la Recherche Biomédicale  
19 (CCPPRB, Paris-Cochin, approval no. 2095). Our study complies with the Declaration of  
20 Helsinki. Control aortas were sampled from dead organ donors with the authorisation of the  
21 French Biomedicine Agency (PFS 09-007, Table 4). Depending on their sizes, samples were  
22 cut in several pieces that were used to prepare conditioned medium, and/or digested for flow  
23 cytometry analysis, and/or fixed in 3.7% paraformaldehyde (PFA) for histological studies, and



1 stored in the Inserm human CV biobank (BB-0033-00029), included in the European network  
2 BBMRI-ERIC.

### 3 **Histology and immunofluorescence on human samples**

4 PFA-fixed aortic tissues were paraffin-embedded. Four  $\mu\text{m}$ -thick sections were deparaffinised  
5 in toluene and rehydrated in ethanol. Sections were subjected to Carstairs' stain, orcein stain or  
6 Perl's + diaminobenzidine (DAB) stain. Alternatively, sections were incubated with retrieval  
7 reagent (R&D Systems), then immunostained using antibodies against IgE (goat polyclonal,  
8 Vector Laboratories), MC tryptase (rabbit monoclonal, clone EPR8476, abcam; or mouse  
9 monoclonal, clone AA1, abcam), CD20 (mouse monoclonal, clone L26, Dako; or goat  
10 polyclonal, ThermoFisher), CD117 (rabbit polyclonal, Dako), or glycophorin A (rabbit  
11 monoclonal, clone EPR8200, abcam). Immunostaining with isotypes were conducted to verify  
12 the specificity of the primary antibodies. Overnight incubation at 4°C with primary antibodies  
13 were followed by incubation with fluorophore-coupled anti-species antibodies (Jackson  
14 Immunoresearch) for one hour at room temperature. References for antibodies are shown in  
15 Supplementary File 1. Nuclei were then stained with Hoechst 53542, and slides were mounted  
16 with fluorescent mounting medium (ProLong Gold, ThermoFisher). Slides were kept in the  
17 dark at 4°C. Blind analysis was performed for the presence of IgE+ TLOs, MCs and  
18 haematomas.

### 19 **Preparation of conditioned medium and immunodetection of soluble molecules**

20 For the preparation of conditioned medium, the adventitia of AAA and control aortas were  
21 separated from the media and cut into small pieces (5 mm<sup>3</sup>). The samples were then incubated  
22 for 24 hours at 37°C in a standardised volume (6 mL/g of tissue) of RPMI 1640 medium (Gibco)  
23 supplemented with antibiotics and antimycotics. The conditioned medium was then centrifuged  
24 and the supernatant aliquoted and frozen at -80°C until use.

1 The IL-4 concentration in conditioned medium from adventitial tissues and serum was analysed  
2 by CBA (BD biosciences). Bead fluorescence was recorded on a LSRII flow cytometer (BD).  
3 Tryptase was quantified by ELISA (USCN). Immunoglobulins were analysed using a bio-plex  
4 pro human isotyping assay (Bio-Rad) according to manufacturer instructions. Beads were  
5 analysed on a Bioplex-200 analyser (Bio-Rad). IL-4 and Tryptase were analysed on a different  
6 set of patients.

### 7 **ROSA mast cell line**

8 The ROSA<sup>KIT</sup> WT human cell line (RRID:CVCL\_5G49) was cultured in the presence of  
9 recombinant human SCF (80 ng/mL, R&D Systems), as described previously (Saleh et al.,  
10 2014). Cells were stimulated in the presence of conditioned medium from AAA and control  
11 adventitia, or PMA (10ng/mL, Sigma-Aldrich) and ionomycin (1µM, Sigma-Aldrich)  
12 (hereafter P+I condition) or IgE (2µg/mL, BeckmanCoulter) for 15 minutes followed by anti-  
13 IgE antibody (5µg/mL). After 1 hour of stimulation, the expression of CD63 in MCs was  
14 analysed by flow cytometry. Alternatively, after 4 hours of stimulation, cells were collected  
15 and dry pellets were frozen for gene expression analysis. In some experiments, 5µM DARPin®  
16 protein bi53\_79 (Eggel et al., 2014) was added to the conditioned medium. Experiment was  
17 repeated twice with similar results.

### 18 **Gene expression analysis**

19 Total RNAs were extracted from ROSA MCs using the PureLink RNA mini kit (Invitrogen),  
20 and mRNA reverse transcription was performed using iScript reverse transcriptase (Bio-Rad).  
21 Real time quantitative PCR (RT-qPCR) was performed on a CFX 100 thermocycler (Bio-Rad)  
22 using the following primers: forward IL-4: GCAGTTCTACAGCCACCAT; reverse IL-4:  
23 ACTCTGGTTGGCTTCCTTCA . One nanogram of cDNA from each sample was mixed with  
24 forward and reverse primers (300 nM) and SYBR Green master mix (Bio-Rad). The

1 amplification program was as follows: A first step of initial denaturation at 95°C for 3 minutes,  
2 then 40 cycles of 3 steps: denaturation at 95°C 15 seconds, annealing at 57°C for 15 seconds,  
3 and a final extension at 72°C for 30 seconds. The data were analysed using the  $2^{-\Delta\Delta C_t}$  formulas:  
4 the Ct values of IL-4 were normalised to the average Ct values of RPS18 (forward RPS18:  
5 GCGGCGGAAAATAGCCTTTG; reverse RPS18: GATCACACGTTCCACCTCATC) and  
6 ACTB (forward ACTB: TCCCTGGAGAAGAGCTACG; reverse ACTB:  
7 TTTCGTGGATGCCACAGGAC) and non-treated MCs were used as reference.

### 8 **Ang-II abdominal aortic pseudoaneurysms in mice**

9 Thirty-eight 28-week-old ApoE-RMB males were used for the experiments, as males are more  
10 susceptible to develop AAAs after Angiotensin II ( AngII) infusion (Manning et al., 2002).  
11 AngII (#A9525, 1 mg/kg/day, Sigma-Aldrich, St Louis, Missouri) was continuously infused  
12 into the experimental mice via osmotic mini-pumps (Model 2004, Alzet, Charles River  
13 Laboratories) that were surgically implanted subcutaneously in the interscapular region under  
14 anaesthesia induced by intraperitoneal injection of ketamine (100 mg/kg) and xylazine (20  
15 mg/kg). Surgery was followed by a buprenorphine intraperitoneal injection (0.1 mg/kg) for  
16 analgesia. Three mice (8%) died within the first 10 days. Fourteen days after inducing AAAs  
17 through AngII infusion (Saraff et al., 2003), mice received two intraperitoneal injection of DT  
18 (1µg/ injection, n=18) at a one-day interval (or PBS in the control group, n=17) in order to  
19 deplete MCs. Randomization was achieved by having mice from each experimental group in  
20 each cage. Mice were sacrificed at day 28 by intracardiac exsanguination under overdose of  
21 anaesthesia (intraperitoneal injection of 150 mg/kg ketamine-HCL and 30 mg/kg xylazine).  
22 Before the exsanguination, a cell suspension from the peritoneum was obtained by peritoneal  
23 lavage with 5 mL of ice-cold PBS. Blood was withdrawn from the right ventricle of the heart  
24 and collected in EDTA tubes for blood cell analysis. The heart and aorta were dissected,  
25 photographed and mounted on cryomolds for further histomorphological analysis based on

1 cryosections. The experiment was repeated twice with similar results. Pooled number of mice  
2 from both experiments who survived and developed aneurysms in each group are summarized  
3 in Table 2.

4 Of note, in RMB mice, DT induces both MC and basophil depletion. While basophils fully  
5 repopulate the blood within 12 days, MCs repopulation of peripheral tissues such as skin or  
6 peritoneum is much slower (Dahdah et al., 2014; Ngo Nyekel et al., 2018). Consistently, two  
7 weeks after DT administration (Day 28 of AngII infusion), MCs were totally absent from the  
8 peritoneal cavity whereas the basophil population was totally replenished in the blood of ApoE-  
9 RMB mice (Figure 4–figure supplement 1). DT injection had no effect on blood basophils,  
10 peritoneal MCs, and aortic tissue MCs in control ApoE<sup>-/-</sup> mice (data not shown).

## 11 **Histology on mouse tissues**

12 MC depletion was analysed on cryosections of mouse aortic roots stained with Toluidine Blue.  
13 Images were captured on a Zeiss Axio Observer Z7 inverted microscope, and MCs were  
14 counted manually. A detailed blind analysis of pseudoaneurysms was performed for mouse  
15 abdominal aortas displaying macroscopic evidence of the occurrence of a pseudoaneurysm.  
16 Cross-cryosections (10 µm) of the aortic segments taken at different levels of the  
17 pseudoaneurysms (every 300 µm) were stained for collagen with picrosirius red (Figure 4–  
18 figure supplement 2A). Images were acquired under polarised light. The size of the different  
19 layers (media, haematoma, adventitial fibrous cap) and the extent of collagen deposition were  
20 quantitatively assessed using Image J.

## 21 **Image acquisition**

22 Images were digitally captured using an AxioObserver epi-fluorescent microscope equipped  
23 with a Colibri 7 LED generator (Zeiss) and an ApoTome system and running Zen Software

1 (Zeiss). Macroscopic images of the human samples were acquired using the NanoZoomer  
2 Digital slide scanner (Hamamatsu Photonics).

### 3 **Flow cytometry analysis**

4 Mouse blood samples collected in EDTA were incubated in Ammonium-Chloride-Potassium  
5 lysis buffer for 5 minutes at room temperature to lyse red blood cells. Cells from blood samples  
6 or 1 mL of peritoneal lavage were stained for dead cells with Live/Dead fixable far red Dead  
7 cell stain kit (Invitrogen) for 30 minutes at 4°C, then incubated with a purified rat anti-mouse  
8 CD16/32 (FcBlock, BD Biosciences) for 15 minutes at 4°C. Cells were then incubated for 20  
9 minutes at 4°C with the following antibodies (from BD Biosciences unless stated otherwise):  
10 BV605 rat anti-mouse CD19 (clone 1D3), FITC rat anti-mouse CD117 (clone 2B8), PerCP rat  
11 anti-mouse CD45 (clone 30-F11), APC hamster anti-mouse FcεRIα (clone MAR-1,  
12 Biolegend), AF700 rat anti-mouse CD3 (clone 172A). References for antibodies are shown in  
13 Supplementary File 1.

14 For human tissue analysis, fresh adventitial layer samples were weighed, cut into small pieces  
15 (<1 mm) and digested using a previously described protocol (Fletcher et al., 2011). After a wash  
16 step, the cells were stained for dead cells with Live/Dead fixable far red Dead cell stain kit  
17 (Invitrogen) for 30 minutes at 4°C, then incubated for 20 minutes at 4°C with a combination of  
18 the following mouse anti-human antibodies: AF488 anti-CD3 (clone UCHT1, BD Biosciences),  
19 PE anti-CD203c (clone NP4D6, Biolegend), PerCP anti-FcεRIα (clone AER-37, Biolegend),  
20 BV421 anti-CD117 (clone 104D2, BD Biosciences), BV500 anti-CD45 (clone HI30, BD  
21 Biosciences), PE-Cy7 anti-CD63 (clone H5C6, BD Biosciences), AF700 anti-CD19 (clone  
22 HIB19, BD Biosciences), AF647 anti-CD107a (clone H4A3, BD Biosciences), BV421 anti-  
23 CD27 (clone O323, Biolegend), BV570 anti-HLA-DR (clone L243, Biolegend), BV785 anti-  
24 CD19 (clone HIB19, Biolegend), APC anti-IgD (clone IA6-2, BD Biosciences), FITC anti-

1 CD38 (clone HIT2, BD Biosciences), PE anti-CD45 (clone HI30, BD Biosciences), BV605  
2 anti-CD45 (clone HI30, BD Biosciences).

3 For mouse peritoneal cells and human adventitial cells, flow-count fluorospheres (Beckman  
4 Coulter) were added to the samples before the acquisition on the cytometer in order to calculate  
5 absolute count of cells. Data were acquired on a LSRII flow cytometer or an ARIA III cell  
6 sorter (BD Biosciences) and analysed using FACSDiva (BD Biosciences) and FlowJo  
7 (TreeStar) softwares.

## 8 **Statistical analysis**

9 Statistical analysis was performed using the JMP9 and Prism software. To compare two  
10 populations, we used Student t-tests or non-parametric Mann-Whitney tests when sample size  
11 was too small ( $n < 10$ ) or when values were not normally distributed. Paired values were  
12 compared using Wilcoxon matched-pairs signed rank test. Pearson correlation coefficients or  
13 p-values of chi-square contingency tests were calculated to assess correlation between  
14 continuous or categorical variables, respectively. Quantitative data are expressed as mean +/-  
15 standard error. Source data with summary statistics can be found in source data files associated  
16 to each figure.

17

## 1 **Acknowledgments**

2 The authors thank Melanie Gettings for her help with manuscript editing, and Emilie Monnet  
3 for her help with the animals.

4

## 5 **Sources of funding**

6 This work was supported by the Institut National de la Santé et de la Recherche Médicale  
7 (INSERM), the Université Paris Cité, and an Emergence grant from the Département Hospitalo-  
8 Universitaire ‘Fibrosis, Inflammation, REmodeling in cardiovascular, respiratory and renal  
9 diseases’ (DHU FIRE, Paris, France). AL was supported by the Domaine d’Intérêt Majeur  
10 ‘Maladies Cardiovasculaires, Obésité, Rein, Diabète’ (CORDDIM) from the Region Ile de  
11 France, and the Groupe de Réflexion sur la Recherche Cardiovasculaire (GRRC)/Fédération  
12 Française de Cardiologie (FFC, Paris, France).

13

## 14 **Related interests**

15 A Eggel is a cofounder and scientific advisor of Excellergy, INC. and ATANIS Biotech AG.  
16 M. Arock is on DSMB for AB Science and advisory board for Blueprint Medicines; receives  
17 consulting fees and/or honoraries from AB Science, Blueprint Medicines and Novartis; and  
18 declares patent #WO2013064639A1 ‘Human mastocyte lines, preparation and uses. P Launay  
19 is the CEO of Inatherys. Details can be found in ICMJE forms.

20

## 1 **Materials availability statement**

2 Use of DARPin<sup>®</sup> protein bi53\_79 and RMB mice requires a MTA. Figure 1–source data 1,  
3 Figure 2–source data 1, Figure 3–source data 1, and Figure 4–source data 1, contain the  
4 numerical data used to generate the figures.

5

6



## 1 **References**

- 2 Abdul-Hussien, H., Soekhoe, R. G., Weber, E., von der Thusen, J. H., Kleemann, R., Mulder,  
3 A., van Bockel, J. H., Hanemaaijer, R., & Lindeman, J. H. (2007). Collagen degradation in  
4 the abdominal aneurysm: a conspiracy of matrix metalloproteinase and cysteine  
5 collagenases. *Am J Pathol*, *170*(3), 809-817. <https://doi.org/10.2353/ajpath.2007.060522>
- 6 Behr Andersen, C., Lindholt, J. S., Urbonavicius, S., Halekoh, U., Jensen, P. S., Stubbe, J.,  
7 Rasmussen, L. M., & Beck, H. C. (2018). Abdominal Aortic Aneurysms Growth Is  
8 Associated With High Concentrations of Plasma Proteins in the Intraluminal Thrombus and  
9 Diseased Arterial Tissue. *Arterioscler Thromb Vasc Biol*, *38*(9), 2254-2267.  
10 <https://doi.org/10.1161/ATVBAHA.117.310126>
- 11 Caligiuri, G., Levy, B. P., Nicoletti, A., & Michel, J.-B. (2019). Role of Biomechanical Stress  
12 in the Pathology of the Aorta. In O. H. Stanger, J. R. Pepper, & L. G. Svensson (Eds.),  
13 *Surgical Management of Aortic Pathology: Current Fundamentals for the Clinical*  
14 *Management of Aortic Disease* (pp. 163-180). Springer Vienna.  
15 [https://doi.org/10.1007/978-3-7091-4874-7\\_11](https://doi.org/10.1007/978-3-7091-4874-7_11)
- 16 Caligiuri, G., Rossignol, P., Julia, P., Groyer, E., Mouradian, D., Urbain, D., Misra, N., Ollivier,  
17 V., Sapoval, M., Boutouyrie, P., Kaveri, S. V., Nicoletti, A., & Lafont, A. (2006). Reduced  
18 immunoregulatory CD31+ T cells in patients with atherosclerotic abdominal aortic  
19 aneurysm. *Arterioscler Thromb Vasc Biol*, *26*(3), 618-623.  
20 <https://doi.org/10.1161/01.ATV.0000200380.73876.d9>
- 21 Clement, M., Guedj, K., Andreatta, F., Morvan, M., Bey, L., Khallou-Laschet, J., Gaston, A. T.,  
22 Delbosc, S., Alsac, J. M., Bruneval, P., Deschildre, C., Le Borgne, M., Castier, Y., Kim, H.  
23 J., Cantor, H., Michel, J. B., Caligiuri, G., & Nicoletti, A. (2015). Control of the T follicular  
24 helper-germinal center B-cell axis by CD8(+) regulatory T cells limits atherosclerosis and

- 1 tertiary lymphoid organ development. *Circulation*, 131(6), 560-570.  
2 <https://doi.org/10.1161/CIRCULATIONAHA.114.010988>
- 3 Dahdah, A., Gautier, G., Attout, T., Fiore, F., Lebourdais, E., Msallam, R., Daeron, M.,  
4 Monteiro, R. C., Benhamou, M., Charles, N., Davoust, J., Blank, U., Malissen, B., &  
5 Launay, P. (2014). Mast cells aggravate sepsis by inhibiting peritoneal macrophage  
6 phagocytosis. *J Clin Invest*, 124(10), 4577-4589. <https://doi.org/10.1172/JCI75212>
- 7 Davis, F. M., Daugherty, A., & Lu, H. S. (2019). Updates of Recent Aortic Aneurysm Research.  
8 *Arterioscler Thromb Vasc Biol*, 39(3), e83-e90.  
9 <https://doi.org/10.1161/ATVBAHA.119.312000>
- 10 Dobrin, P. B., Baker, W. H., & Gley, W. C. (1984). Elastolytic and collagenolytic studies of  
11 arteries. Implications for the mechanical properties of aneurysms. *Arch Surg*, 119(4), 405-  
12 409. <https://doi.org/10.1001/archsurg.1984.01390160041009>
- 13 Dutertre, C. A., Clement, M., Morvan, M., Schakel, K., Castier, Y., Alsac, J. M., Michel, J. B.,  
14 & Nicoletti, A. (2014). Deciphering the stromal and hematopoietic cell network of the  
15 adventitia from non-aneurysmal and aneurysmal human aorta. *PLoS One*, 9(2), e89983.  
16 <https://doi.org/10.1371/journal.pone.0089983>
- 17 Eggel, A., Baravalle, G., Hobi, G., Kim, B., Buschor, P., Forrer, P., Shin, J. S., Vogel, M.,  
18 Stadler, B. M., Dahinden, C. A., & Jardeky, T. S. (2014). Accelerated dissociation of IgE-  
19 FcepsilonRI complexes by disruptive inhibitors actively desensitizes allergic effector cells.  
20 *J Allergy Clin Immunol*, 133(6), 1709-1719 e1708.  
21 <https://doi.org/10.1016/j.jaci.2014.02.005>
- 22 Fletcher, A. L., Malhotra, D., Acton, S. E., Lukacs-Kornek, V., Bellemare-Pelletier, A., Curry,  
23 M., Armant, M., & Turley, S. J. (2011). Reproducible isolation of lymph node stromal cells  
24 reveals site-dependent differences in fibroblastic reticular cells. *Front Immunol*, 2, 35.  
25 <https://doi.org/10.3389/fimmu.2011.00035>

- 1 Furubayashi, K., Takai, S., Jin, D., Muramatsu, M., Ibaraki, T., Nishimoto, M., Fukumoto, H.,  
2 Katsumata, T., & Miyazaki, M. (2007). The significance of chymase in the progression of  
3 abdominal aortic aneurysms in dogs. *Hypertens Res*, 30(4), 349-357.  
4 <https://doi.org/10.1291/hypres.30.349>
- 5 Guedj, K., Khallou-Laschet, J., Clement, M., Morvan, M., Delbosc, S., Gaston, A. T., Andreato,  
6 F., Castier, Y., Deschildre, C., Michel, J. B., Caligiuri, G., & Nicoletti, A. (2014).  
7 Inflammatory micro-environmental cues of human atherothrombotic arteries confer to  
8 vascular smooth muscle cells the capacity to trigger lymphoid neogenesis. *PLoS One*, 9(12),  
9 e116295. <https://doi.org/10.1371/journal.pone.0116295>
- 10 Guo, W., Gao, R., Zhang, W., Ge, W., Ren, M., Li, B., Zhao, H., & Wang, J. (2019). IgE  
11 Aggravates the Senescence of Smooth Muscle Cells in Abdominal Aortic Aneurysm by  
12 Upregulating LincRNA-p21. *Aging Dis*, 10(4), 699-710.  
13 <https://doi.org/10.14336/AD.2018.1128>
- 14 Guo, X., Yuan, S., Liu, Y., Zeng, Y., Xie, H., Liu, Z., Zhang, S., Fang, Q., Wang, J., & Shen,  
15 Z. (2016). Serum IgE levels are associated with coronary artery disease severity.  
16 *Atherosclerosis*, 251, 355-360. <https://doi.org/10.1016/j.atherosclerosis.2016.05.020>
- 17 He, J. S., Meyer-Hermann, M., Xiangying, D., Zuan, L. Y., Jones, L. A., Ramakrishna, L., de  
18 Vries, V. C., Dolpady, J., Aina, H., Joseph, S., Narayanan, S., Subramaniam, S., Puthia, M.,  
19 Wong, G., Xiong, H., Poidinger, M., Urban, J. F., Lafaille, J. J., & Curotto de Lafaille, M.  
20 A. (2013). The distinctive germinal center phase of IgE+ B lymphocytes limits their  
21 contribution to the classical memory response. *J Exp Med*, 210(12), 2755-2771.  
22 <https://doi.org/10.1084/jem.20131539>
- 23 Kaartinen, M., Penttila, A., & Kovanen, P. T. (1994). Accumulation of activated mast cells in  
24 the shoulder region of human coronary atheroma, the predilection site of atheromatous  
25 rupture. *Circulation*, 90(4), 1669-1678. <https://doi.org/10.1161/01.cir.90.4.1669>

- 1 Kurvers, H., Veith, F. J., Lipsitz, E. C., Ohki, T., Gargiulo, N. J., Cayne, N. S., Suggs, W. D.,  
2 Timaran, C. H., Kwon, G. Y., Rhee, S. J., & Santiago, C. (2004). Discontinuous, staccato  
3 growth of abdominal aortic aneurysms. *J Am Coll Surg*, 199(5), 709-715.  
4 <https://doi.org/10.1016/j.jamcollsurg.2004.07.031>
- 5 Libby, P., Loscalzo, J., Ridker, P. M., Farkouh, M. E., Hsue, P. Y., Fuster, V., Hasan, A. A., &  
6 Amar, S. (2018). Inflammation, Immunity, and Infection in Atherothrombosis: JACC  
7 Review Topic of the Week. *J Am Coll Cardiol*, 72(17), 2071-2081.  
8 <https://doi.org/10.1016/j.jacc.2018.08.1043>
- 9 Manning, M. W., Cassi, L. A., Huang, J., Szilvassy, S. J., & Daugherty, A. (2002). Abdominal  
10 aortic aneurysms: fresh insights from a novel animal model of the disease. *Vasc Med*, 7(1),  
11 45-54. <https://doi.org/10.1191/1358863x02vm413ra>
- 12 McGloughlin, T. M. (2011). Biomechanics and mechanobiology of aneurysms.
- 13 Merluzzi, S., Frossi, B., Gri, G., Parusso, S., Tripodo, C., & Pucillo, C. (2010). Mast cells  
14 enhance proliferation of B lymphocytes and drive their differentiation toward IgA-secreting  
15 plasma cells. *Blood*, 115(14), 2810-2817. <https://doi.org/10.1182/blood-2009-10-250126>
- 16 Mohanta, S. K., Yin, C., Peng, L., Srikakulapu, P., Bontha, V., Hu, D., Weih, F., Weber, C.,  
17 Gerdes, N., & Habenicht, A. J. (2014). Artery tertiary lymphoid organs contribute to innate  
18 and adaptive immune responses in advanced mouse atherosclerosis. *Circ Res*, 114(11),  
19 1772-1787. <https://doi.org/10.1161/CIRCRESAHA.114.301137>
- 20 Ngo Nyekel, F., Pacreau, E., Benadda, S., Msallam, R., Abrink, M., Pejler, G., Davoust, J.,  
21 Benhamou, M., Charles, N., Launay, P., Blank, U., & Gautier, G. (2018). Mast Cell  
22 Degranulation Exacerbates Skin Rejection by Enhancing Neutrophil Recruitment. *Front*  
23 *Immunol*, 9, 2690. <https://doi.org/10.3389/fimmu.2018.02690>
- 24 Nicoletti, A., Khallou-Laschet, J., Guedj, K., Clement, M., Gaston, A. T., Morvan, M., Dutertre,  
25 C. A., Michel, J. B., Thauinat, O., & Caligiuri, G. (2013). L19. Lymphoid neogenesis in

- 1 vascular chronic inflammation. *Presse Med*, 42(4 Pt 2), 558-560.  
2 <https://doi.org/10.1016/j.lpm.2013.01.018>
- 3 Nigrovic, P. A., Gray, D. H., Jones, T., Hallgren, J., Kuo, F. C., Chaletzky, B., Gurish, M.,  
4 Mathis, D., Benoist, C., & Lee, D. M. (2008). Genetic inversion in mast cell-deficient (Wsh)  
5 mice interrupts corin and manifests as hematopoietic and cardiac aberrancy. *Am J Pathol*,  
6 173(6), 1693-1701. <https://doi.org/10.2353/ajpath.2008.080407>
- 7 Pippi, E., Nayar, S., Gardner, D. H., Colafrancesco, S., Smith, C., & Barone, F. (2018). Tertiary  
8 Lymphoid Structures: Autoimmunity Goes Local. *Front Immunol*, 9, 1952.  
9 <https://doi.org/10.3389/fimmu.2018.01952>
- 10 Sakalihasan, N., Michel, J. B., Katsargyris, A., Kuivaniemi, H., Defraigne, J. O., Nchimi, A.,  
11 Powell, J. T., Yoshimura, K., & Hultgren, R. (2018). Abdominal aortic aneurysms. *Nat Rev*  
12 *Dis Primers*, 4(1), 34. <https://doi.org/10.1038/s41572-018-0030-7>
- 13 Saleh, R., Wedeh, G., Herrmann, H., Bibi, S., Cerny-Reiterer, S., Sadovnik, I., Blatt, K.,  
14 Hadzijasufovic, E., Jeanningros, S., Blanc, C., Legarff-Tavernier, M., Chapiro, E., Nguyen-  
15 Khac, F., Subra, F., Bonnemye, P., Dubreuil, P., Desplat, V., Merle-Beral, H., Willmann,  
16 M., Rulicke, T., Valent, P., & Arock, M. (2014). A new human mast cell line expressing a  
17 functional IgE receptor converts to tumorigenic growth by KIT D816V transfection. *Blood*,  
18 124(1), 111-120. <https://doi.org/10.1182/blood-2013-10-534685>
- 19 Saraff, K., Babamusta, F., Cassis, L. A., & Daugherty, A. (2003). Aortic dissection precedes  
20 formation of aneurysms and atherosclerosis in angiotensin II-infused, apolipoprotein E-  
21 deficient mice. *Arterioscler Thromb Vasc Biol*, 23(9), 1621-1626.  
22 <https://doi.org/10.1161/01.ATV.0000085631.76095.64>
- 23 Saunders, S. P., Ma, E. G. M., Aranda, C. J., & Curotto de Lafaille, M. A. (2019). Non-classical  
24 B Cell Memory of Allergic IgE Responses. *Front Immunol*, 10, 715.  
25 <https://doi.org/10.3389/fimmu.2019.00715>

- 1 Sillesen, H., Eldrup, N., Hultgren, R., Lindeman, J., Bredahl, K., Thompson, M., Wanhainen,  
2 A., Wingren, U., Swedenborg, J., & Investigators, A. T. (2015). Randomized clinical trial  
3 of mast cell inhibition in patients with a medium-sized abdominal aortic aneurysm. *Br J*  
4 *Surg*, *102*(10), 1295. <https://doi.org/10.1002/bjs.9917>
- 5 Sun, J., Sukhova, G. K., Yang, M., Wolters, P. J., MacFarlane, L. A., Libby, P., Sun, C., Zhang,  
6 Y., Liu, J., Ennis, T. L., Knispel, R., Xiong, W., Thompson, R. W., Baxter, B. T., & Shi, G.  
7 P. (2007). Mast cells modulate the pathogenesis of elastase-induced abdominal aortic  
8 aneurysms in mice. *J Clin Invest*, *117*(11), 3359-3368. <https://doi.org/10.1172/JCI31311>
- 9 Sun, J., Zhang, J., Lindholt, J. S., Sukhova, G. K., Liu, J., He, A., Abrink, M., Pejler, G.,  
10 Stevens, R. L., Thompson, R. W., Ennis, T. L., Gurish, M. F., Libby, P., & Shi, G. P. (2009).  
11 Critical role of mast cell chymase in mouse abdominal aortic aneurysm formation.  
12 *Circulation*, *120*(11), 973-982. <https://doi.org/10.1161/CIRCULATIONAHA.109.849679>
- 13 Swedenborg, J., Mayranpaa, M. I., & Kovanen, P. T. (2011). Mast cells: important players in  
14 the orchestrated pathogenesis of abdominal aortic aneurysms. *Arterioscler Thromb Vasc*  
15 *Biol*, *31*(4), 734-740. <https://doi.org/10.1161/ATVBAHA.110.213157>
- 16 Trachet, B., Aslanidou, L., Piersigilli, A., Fraga-Silva, R. A., Sordet-Dessimoz, J., Villanueva-  
17 Perez, P., Stampanoni, M. F. M., Stergiopoulos, N., & Segers, P. (2017). Angiotensin II  
18 infusion into ApoE<sup>-/-</sup> mice: a model for aortic dissection rather than abdominal aortic  
19 aneurysm? *Cardiovasc Res*, *113*(10), 1230-1242. <https://doi.org/10.1093/cvr/cvx128>
- 20 Tsuruda, T., Kato, J., Hatakeyama, K., Kojima, K., Yano, M., Yano, Y., Nakamura, K.,  
21 Nakamura-Uchiyama, F., Matsushima, Y., Imamura, T., Onitsuka, T., Asada, Y., Nawa, Y.,  
22 Eto, T., & Kitamura, K. (2008). Adventitial mast cells contribute to pathogenesis in the  
23 progression of abdominal aortic aneurysm. *Circ Res*, *102*(11), 1368-1377.  
24 <https://doi.org/10.1161/CIRCRESAHA.108.173682>

- 1 Tuleta, I., Skowasch, D., Aurich, F., Eckstein, N., Schueler, R., Pizarro, C., Schahab, N.,  
2 Nickenig, G., Schaefer, C., & Pingel, S. (2017). Asthma is associated with atherosclerotic  
3 artery changes. *PLoS One*, *12*(10), e0186820.  
4 <https://doi.org/10.1371/journal.pone.0186820>
- 5 Wang, Y., Shiota, N., Leskinen, M. J., Lindstedt, K. A., & Kovanen, P. T. (2001). Mast cell  
6 chymase inhibits smooth muscle cell growth and collagen expression in vitro: transforming  
7 growth factor-beta1-dependent and -independent effects. *Arterioscler Thromb Vasc Biol*,  
8 *21*(12), 1928-1933. <https://doi.org/10.1161/hq1201.100227>
- 9 Wilson, J. S., Virag, L., Di Achille, P., Karsaj, I., & Humphrey, J. D. (2013).  
10 Biochemomechanics of intraluminal thrombus in abdominal aortic aneurysms. *J Biomech*  
11 *Eng*, *135*(2), 021011. <https://doi.org/10.1115/1.4023437>

12

13

14

15

## 1 **Figures**

### 2 **Figure 1. IgE-producing TLOs are present in the adventitia of human AAAs.**

3 (A) Cross-sections of AAAs were stained for CD20 (magenta) and IgE (green). Dense DAPI<sup>+</sup>  
4 lymphoid aggregates highly enriched in CD20<sup>+</sup> B cells correspond to TLOs. Several TLOs  
5 displayed a strong IgE staining projecting in the CD20<sup>+</sup> B cells comprised in the DAPI “light  
6 zone” of TLOs (white arrowheads). The magnified inset shows 5 adventitial TLOs (cluster of  
7 DAPI<sup>+</sup> CD20<sup>+</sup> B cells), 3 of which are IgE<sup>+</sup>. adv: adventitia, m: media, thr; thrombus.  
8 Representative image of 9 different samples. Scale bar: 2.5 mm. (B) Maximum diameter size  
9 of AAAs depending on the absence (no) or the presence of TLOs. p value (Mann-Whitney test)  
10 is indicated on the plots. (C) Serial cross-sections of AAAs were coloured with Carstairs’  
11 staining, where fibrin appears in bright red, collagen in blue, red blood cells in yellow and  
12 nuclei in black; Perl’s+DAB staining allows to visualise redox-active iron; Orcein staining  
13 permits to detect elastin fibres. The lumen is at the bottom of each picture and the media (m) is  
14 indicated by the blue bar on the side of the pictures. Black arrowheads point at red blood cells  
15 outside blood vessels, reminiscent of recent intramural haematomas. Scale bar: 1 mm. Right  
16 panels: magnified insets. (D) Contrast-enhanced tomography angiograms of an AAA  
17 displaying blood disruption from the aortic lumen to the aortic wall through the intraluminal  
18 thrombus (white arrow).

19



1 **Figure 1–figure supplement 1. IgEs are elevated in the plasma and adventitia of**  
2 **AAA patients.**

3 IgEs were titrated in the plasma (A) and conditioned medium from adventitia (B) of NAA organ  
4 donors and AAA patients. Mann-Whitney tests were used to compare groups. \*\*:  $p < 0.01$ ; \*\*\*:  
5  $p < 0.001$ .

7 **Figure 1–figure supplement 2. GC B cells and plasma cells are elevated in AAA**  
8 **adventitia.**

9 Adventitia from NAA organ donors and AAA patients were digested and analysed by flow  
10 cytometry after the addition of fluorescent count beads. (A) B cells were identified as singlet,  
11 autofluorescent<sup>-</sup>, live CD45<sup>+</sup> CD19<sup>+</sup> cells, and their number was calculated in each sample,  
12 showing a statistically significant increase of B cells in AAA samples. \*\*\*,  $p < 0.001$ , Mann-  
13 Whitney test. (B) B cells were identified as in (A), and subsets were defined as follows: naïve  
14 B cells, IgD<sup>+</sup> CD38<sup>-</sup>; plasma cells (PC), IgD<sup>-</sup> CD38<sup>hi</sup>; germinal centre B cells (GC), IgD<sup>-</sup> CD38<sup>+</sup>  
15 HLA-DR<sup>hi</sup>; memory B cells, IgD<sup>-</sup> CD38<sup>-</sup> HLA-DR<sup>+</sup>. Representative samples show that GC B  
16 cells and plasma cells were present in the adventitia of AAA, while they were barely detected  
17 in the matched blood of the AAA patient, or in the adventitia of NAA.

19 **Figure 1–figure supplement 3. AAAs with ancient or no intramural haematomas.**

20 Histological staining of NAAs (A) and AAAs (B-C). Serial sections were stained with  
21 Carstairs's stain, Perl's+DAB stain and Orcein stain as in Figure 1C. The squares frame the  
22 localisation of the details shown in the insets. The lumen is at the bottom of each picture, and  
23 the media (m) is indicated by the blue bar on the side of the pictures. In A, intact elastin fibers

1 can be seen in the media on the Orcein stain. In B, black arrows indicate iron deposits in the  
2 absence of red blood cells, suggestive of an ancient intramural haematoma. An intraluminal  
3 thrombus (\*) can be seen in C, where no signs of intramural haematoma were seen. Scale bar:  
4 1 mm. (D) Contrast-enhanced tomography angiograms of AAAs. White arrows: blood  
5 disruption from the aortic lumen to the aortic wall through the intraluminal thrombus.

6

7 **Figure 1–figure supplement 4. Proximity of micro-fissures and MC degranulation**  
8 **in human AAAs.**

9 Serial sections of an AAA sample with a micro-fissure (A-C) and from a NAA sample (D-F)  
10 were stained with: Carstairs's stain (A and D); orcein to reveal elastin fibres (B and E); and  
11 tryptase (red) and glycophorin A (gray) to detect MCs/tryptase<sup>+</sup> granules and red blood cells,  
12 respectively (C and F; the elastin fibres were autofluorescent: green). The pictures in B and C,  
13 and E and F, correspond to the green insets in A and D, respectively. The entry site of blood  
14 into the aortic wall in the AAA sample can be observed on the Carstairs's stain (A, red blood  
15 cells appear in yellow). The blood entry site visible on the Carstairs's stain (A) and with the  
16 glycophorin A stain (C) was associated with degraded elastin fibres (black arrow on orcein stain  
17 in B) and the presence of MCs (white arrowhead) and tryptase<sup>+</sup> granules (C). Note the normal  
18 aspect of the elastin fibers (E) as well as the absence of tryptase and red blood cells (F) in the  
19 control. Scale bars: A and D 2.5 mm; others: 200 µm.

20

21 **Figure 1–source data 1.**

22 This file contains the numerical data and summary statistics used to generate the graphs  
23 presented in Figure 1 and its supplements.

24

1 **Figure 2. IgE-producing TLOs, activated MCs and intramural haematomas are in**  
2 **close proximity in human AAAs.**

3 (A) Cross-sections of AAAs were coloured with Perl's+DAB staining. TLOs (circled with  
4 dashed line) are found at proximity of haematomas (arrowheads). Scale bar: 500  $\mu$ m. (B)  
5 Consecutive sections were stained for CD20 (magenta), IgE (green), CD117 (red) and DAPI  
6 (grey). B cells (CD20<sup>+</sup> and DAPI<sup>+</sup>) appear in light pink, autofluorescent red blood cells (low  
7 intensity in the CD20 channel and DAPI<sup>-</sup>) appear in magenta, and MCs (CD117<sup>+</sup> IgE<sup>+</sup>) appear  
8 in yellow. Scale bar: 250  $\mu$ m. (C) Magnified inset highlighting the close proximity of IgE<sup>+</sup>  
9 TLOs (dashed circle), red blood cells (white arrowheads) and MCs (blue arrows). (D)  
10 Magnified inset highlighting MCs (blue arrows) at proximity to intramural haematoma. (E-F)  
11 Adventitia from NAA organ donors and AAA patients were digested and analysed by flow  
12 cytometry after the addition of fluorescent count beads. Singlet, autofluorescent, live CD45<sup>+</sup>  
13 cells were selected, and MCs were identified as CD3<sup>-</sup> CD19<sup>-</sup> Fc $\epsilon$ RIa<sup>+</sup> CD117<sup>+</sup> cells (E). The  
14 number of MCs (F, left) and activated (CD107a<sup>hi</sup>) MCs (F, right) was calculated in each sample.  
15 Error bars represent mean +/- standard error. \*\*, p < 0.01; \*\*\*, p < 0.001, Mann-Whitney test.  
16 (G-H) Cross-sections of AAAs were stained for CD20 (magenta), IgE (green), and tryptase  
17 (red). MCs (tryptase<sup>+</sup> IgE<sup>+</sup>) were detected around TLOs. Scale bar: 100  $\mu$ m. The magnified  
18 inset (H) shows a degranulating tryptase<sup>+</sup> MC at proximity of a TLO.

19  
20 **Figure 2–figure supplement 1. MCs accumulate in the adventitia of human AAAs.**

21 Carstairs' stain (A) and toluidine blue stain (B-C) on serial sections of a representative micro-  
22 fissured AAA sample. MCs appear purple on toluidine blue stain (indicated with black circles).  
23 TLOs are circled with a dotted line. Scale bar: 500  $\mu$ m.

24

1 **Figure 2–source data 1.**

2 This file contains the numerical data and summary statistics used to generate the graphs

3 presented in Figure 2.

4

5

1 **Figure 3. MC degranulation and IgE-dependent IL-4 production in response to**  
2 **conditioned medium from AAA adventitia.**

3 (A-D) ROSA MCs were cultured in the presence of conditioned medium from adventitia of  
4 control organ donors (NAA) and AAA patients. DARPin<sup>®</sup> protein bi53\_79 (5  $\mu$ M) was added  
5 (+D) or not (-D) to inhibit IgE binding to MCs' Fc $\epsilon$ RI (C-D). (A, C) After 1 hr, degranulation  
6 (MFI CD63) was assessed by flow cytometry. The dotted line indicates CD63 MFI in non-  
7 stimulated cells. (B, D) After 4 hrs, mRNA IL-4 level was analysed by RT-PCR ( $2^{-\Delta\Delta C_t}$ ,  
8 normalised to RP18S and non-stimulated cells). \*,  $p < 0.05$  (A,B: Mann-Whitney test; C,D:  
9 Wilcoxon matched-pairs signed rank test). (E, F) Concentrations of IL-4, tryptase, and IgE were  
10 measured in conditioned medium from AAA adventitia. \*,  $p < 0.05$ ; \*\*\*,  $p < 0.001$  (Pearson  
11 correlation analysis).

12

13 **Figure 3–figure supplement 1. No correlation between tryptase, IgE and IL-4 in**  
14 **the plasma of AAA patients.**

15 IL-4, tryptase, and IgE concentrations were measured in the serum of AAA patients (same  
16 patients as in Fig. 4D).  $r^2$  and p-values from Pearson correlation analysis are indicated.

17

18 **Figure 3–source data 1.**

19 This file contains the numerical data and summary statistics used to generate the graphs  
20 presented in Figure 3 and its supplement.

21

22

23

1 **Figure 4. MCs depletion decreases aneurysmal growth after dissections in ApoE-**  
2 **RMB mice.**

3 (A) Experimental protocol, showing the normal course of pseudoaneurysm development in the  
4 Ang II infusion model, and the presence or absence of MCs depending on the treatment (PBS  
5 in blue or DT in red). (B) Toluidine blue stain on aortic root cross-sections of DT- and PBS-  
6 treated mice. The arrow points to one of the MCs detected in the aortic root adventitia of a PBS  
7 control mouse. Scale bar: 250  $\mu$ m. (C). Quantification of MCs in aortic roots. \*\*\*,  $p < 0.001$ ,  
8 Mann-Whitney test. (D) Macroscopic images of the hearts and aortas of DT- and PBS-treated  
9 mice displaying aneurysms (indicated by arrows). (E) Consecutive cross-sections stained with  
10 Masson Trichrome (top, scale bar: 500  $\mu$ m) or with Sirius red (bottom; polarised light). Aorta  
11 outer diameter (F) and collagen density of the aortic wall (G) for mice presenting  
12 pseudoaneurysms (PBS: n=7; DT; n=6) were calculated by computer-assisted morphometry on  
13 cross-sections stained with Sirius red. Data from sections taken at different levels (every 300  
14  $\mu$ m) from each pseudoaneurysm were used for calculations (Supplemental Figure 8A), and  
15 aligned to the layer with the largest haematoma. Mean +/- standard error; Mann-Whitney test,  
16 \*\*:  $p < 0.01$ ; \*\*\*:  $p < 0.001$ .

17

18 **Figure 4—figure supplement 1. Repopulation of basophils in the blood and MCs in**  
19 **the peritoneum after DT depletion in ApoE RMB mice.**

20 ApoE-RMB mice were treated as in Figure 4A. At day 14 after DT (n=9) or PBS (n=10)  
21 injection (day 28 of Ang II infusion), mice were sacrificed. (A) Blood basophils were identified  
22 among singlet cells, as CD45<sup>+</sup> Live/Dead<sup>-</sup> CD3<sup>-</sup> CD19<sup>-</sup> FcεRIa<sup>+</sup> Tomato<sup>+</sup> cells (19). (B)  
23 Percentage of basophils within singlet cells, CD45<sup>+</sup> Live/Dead<sup>-</sup> cells. (C) Peritoneal MCs were  
24 identified among singlet cells as CD45<sup>+</sup> Live/Dead<sup>-</sup> CD3<sup>-</sup> CD19<sup>-</sup> FcεRIa<sup>+</sup> Tomato<sup>+</sup> cells

1 CD117<sup>+</sup> cells<sup>20</sup>. (D) Number of MCs per peritoneal lavage. \*\*\*:  $p < 0.0001$ , Mann-Whitney test.

2 Data are representative of two experiments.

3

4 **Figure 4—figure supplement 2. MCs promote pseudoaneurysm expansion after**  
5 **dissection in ApoE-RMB mice.**

6 (A) Sections taken at different levels (every 300  $\mu\text{m}$ ) from each pseudoaneurysm were used for  
7 analysis. (B) Vascular wall layers were defined by computer-assisted morphometry on Sirius  
8 red-stained cross-sections (Figure 4E) of pseudoaneurysm (scale bar: 500  $\mu\text{m}$ ). Size (C) and  
9 collagen density (D) of the different layers were calculated by computer-assisted morphometry,  
10 and plotted relatively to the distance from the layer with the largest haematoma. Mann-Whitney  
11 test, \*\*:  $p < 0.01$ ; \*\*\*:  $p < 0.001$ .

12

13 **Figure 4—source data 1.**

14 This file contains the numerical data and summary statistics used to generate the graphs  
15 presented in Figure 4 and its supplements.

16

17

1 **Figure 5. Schematic overview of the IgE/MC/B cell self-sustained loop in dissecting**

2 **AAAs.**

3 Locally produced IgEs (and may be other isotype Igs) complexed with lesion-specific antigens  
4 activate MCs. Additional triggers from the arterial wall, such as pro-inflammatory cytokines  
5 and DAMPs, may contribute to MC activation/degranulation. Proteases and inflammatory  
6 mediators hence released from MCs increase the risk of micro-fissures, and MC-derived IL-4  
7 promotes the synthesis of more IgEs by TLO B cells. These events lead to an amplification loop  
8 of the pathology.

9



## 1 **Tables**

2 **Table 1: Patients' characteristics according to the presence of intramural**  
3 **haematomas.**

|                                  | <b>None</b><br>(n=2, 8%) | <b>Ancient</b><br>(n=2, 8%) | <b>Recent</b><br>(n=21, 82%) |
|----------------------------------|--------------------------|-----------------------------|------------------------------|
| <b>Age (years)</b>               | 70 +/- 7                 | 67+/- 1                     | 71 +/- 2                     |
| <b>Male (%)</b>                  | 100%                     | 100%                        | 90%                          |
| <b>Max. aortic diameter (cm)</b> | 63 +/- 3                 | 66 +/- 14                   | 61 +/- 4                     |
| <b>Diabetes (%)</b>              | 0%                       | 0%                          | 7%                           |
| <b>Hypertension (%)</b>          | 100%                     | 100%                        | 87%                          |
| <b>Hyperlipidaemia (%)</b>       | 0%                       | 50%                         | 53%                          |
| <b>Smoking (%)</b>               | 50%                      | 50%                         | 93%                          |

4  
5  
6  
7 Values are mean +/- SEM or %. Ancient intramural haematomas are characterised by ferrous  
8 iron deposits with few red blood cells in the media (Figure 1–figure supplement 3B) and recent  
9 intramural haematomas are characterized by abundant red blood cells in the media (Figure 1C).

10  
11

1

**Table 2: ApoE-RMB survival and pseudoaneurysm occurrence.**

|                       | <b>PBS</b><br>(n = 17)   | <b>DT</b><br>(n = 18)     | <b>p-value</b> |
|-----------------------|--------------------------|---------------------------|----------------|
| <b>Pseudoaneurysm</b> | n = 7 (47%)              | n = 8 (44%)               | 0.85           |
| <b>Death*</b>         | n = 0 (0% <sup>†</sup> ) | n = 2 (25% <sup>†</sup> ) | 0.15           |

2

3 \* , dead mice presented pseudoaneurysms and died 21 days after the beginning of AngII infusion

4 (7 days after DT treatment). <sup>†</sup> , % of mice with AAA.

5

6

1

**Table 3: Patients' characteristics.**

|                                     | <b>All</b><br>(n=57) | <b>Histology</b><br>(n=25) | <b>FC</b><br>(n=25) | <b>CM</b><br>(n=37) |
|-------------------------------------|----------------------|----------------------------|---------------------|---------------------|
| <b>Age (yrs)</b>                    | 68 +/- 2             | 70 +/- 2                   | 73 +/- 2            | 68 +/- 2            |
| <b>Male</b>                         | 86%                  | 92%                        | 92%                 | 84%                 |
| <b>Aneurysm location</b>            |                      |                            |                     |                     |
| Suprarenal                          | 2.5%                 | 5%                         | 0%                  | 4%                  |
| Juxtarenal                          | 2.5%                 | 5%                         | 0%                  | 0%                  |
| Subrenal                            | 59%                  | 58%                        | 83%                 | 57%                 |
| Subrenal+iliac                      | 36%                  | 32%                        | 17%                 | 39%                 |
| <b>Maximum aortic diameter (cm)</b> | 61 +/- 2             | 61 +/- 3                   | 67 +/- 4            | 63 +/- 3            |
| <b>Clinical Features</b>            |                      |                            |                     |                     |
| Diabetes                            | 5%                   | 5%                         | 0%                  | 7%                  |
| Hypertension                        | 81%                  | 89%                        | 86%                 | 87%                 |
| Hyperlipidaemia                     | 40%                  | 47%                        | 58%                 | 37%                 |
| Smoking                             | 83%                  | 84%                        | 86%                 | 80%                 |
| <b>Anti-coagulants</b>              | 15%                  | 17%                        | 27%                 | 15%                 |

2

3 Values are mean +/- SEM or %, for all AAA samples, or samples according to processing (some  
4 samples were used for several kind of analysis). FC: flow cytometry analysis (MCs and/or B  
5 cells); CM: conditioned medium (IgE concentration and/or MC stimulation).

6

1

**Table 4: NAA healthy donors' characteristics.**

|                               | <b>All</b><br>(n=39) | <b>Histology</b><br>(n=7) | <b>FC</b><br>(n=16) | <b>CM</b><br>(n=24) |
|-------------------------------|----------------------|---------------------------|---------------------|---------------------|
| <b>Age (yrs)</b>              | 55 +/- 3             | 53 +/- 9                  | 55 +/- 5            | 56 +/- 4            |
| <b>Male</b>                   | 61%                  | 80%                       | 56%                 | 61%                 |
| <b>Atherosclerotic lesion</b> |                      |                           |                     |                     |
| None                          | 28%                  | 29%                       | 31%                 | 25%                 |
| Fatty streak                  | 44%                  | 43%                       | 31%                 | 54%                 |
| Fibrolipidic                  | 26%                  | 29%                       | 31%                 | 17%                 |
| Intraplaque hemorrhage        | 3%                   | 0%                        | 6%                  | 4%                  |

2

3 Values are mean +/- SEM or %, for all NAA samples, or samples according to processing (some  
4 samples were used for several kind of analysis). FC: flow cytometry analysis (MCs and/or B  
5 cells); CM: conditioned medium (IgE concentration and/or mast cell stimulation).

6

7

1 **Additional files**

2 **Supplementary file 1: References for antibodies used in this study.**

3

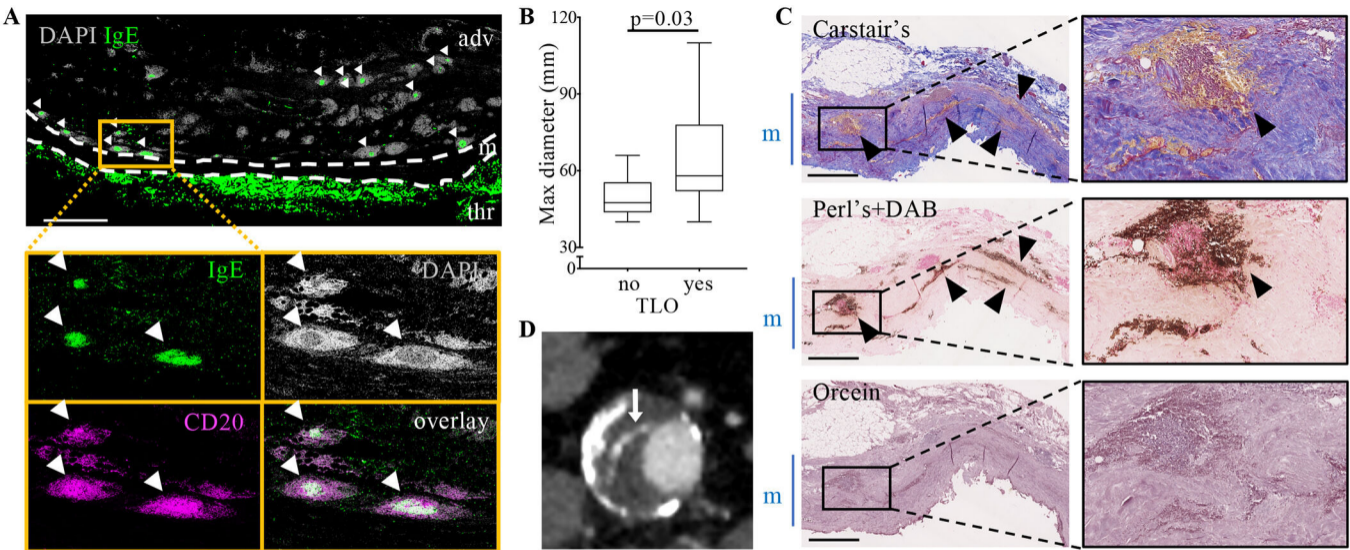

**Figure 1**

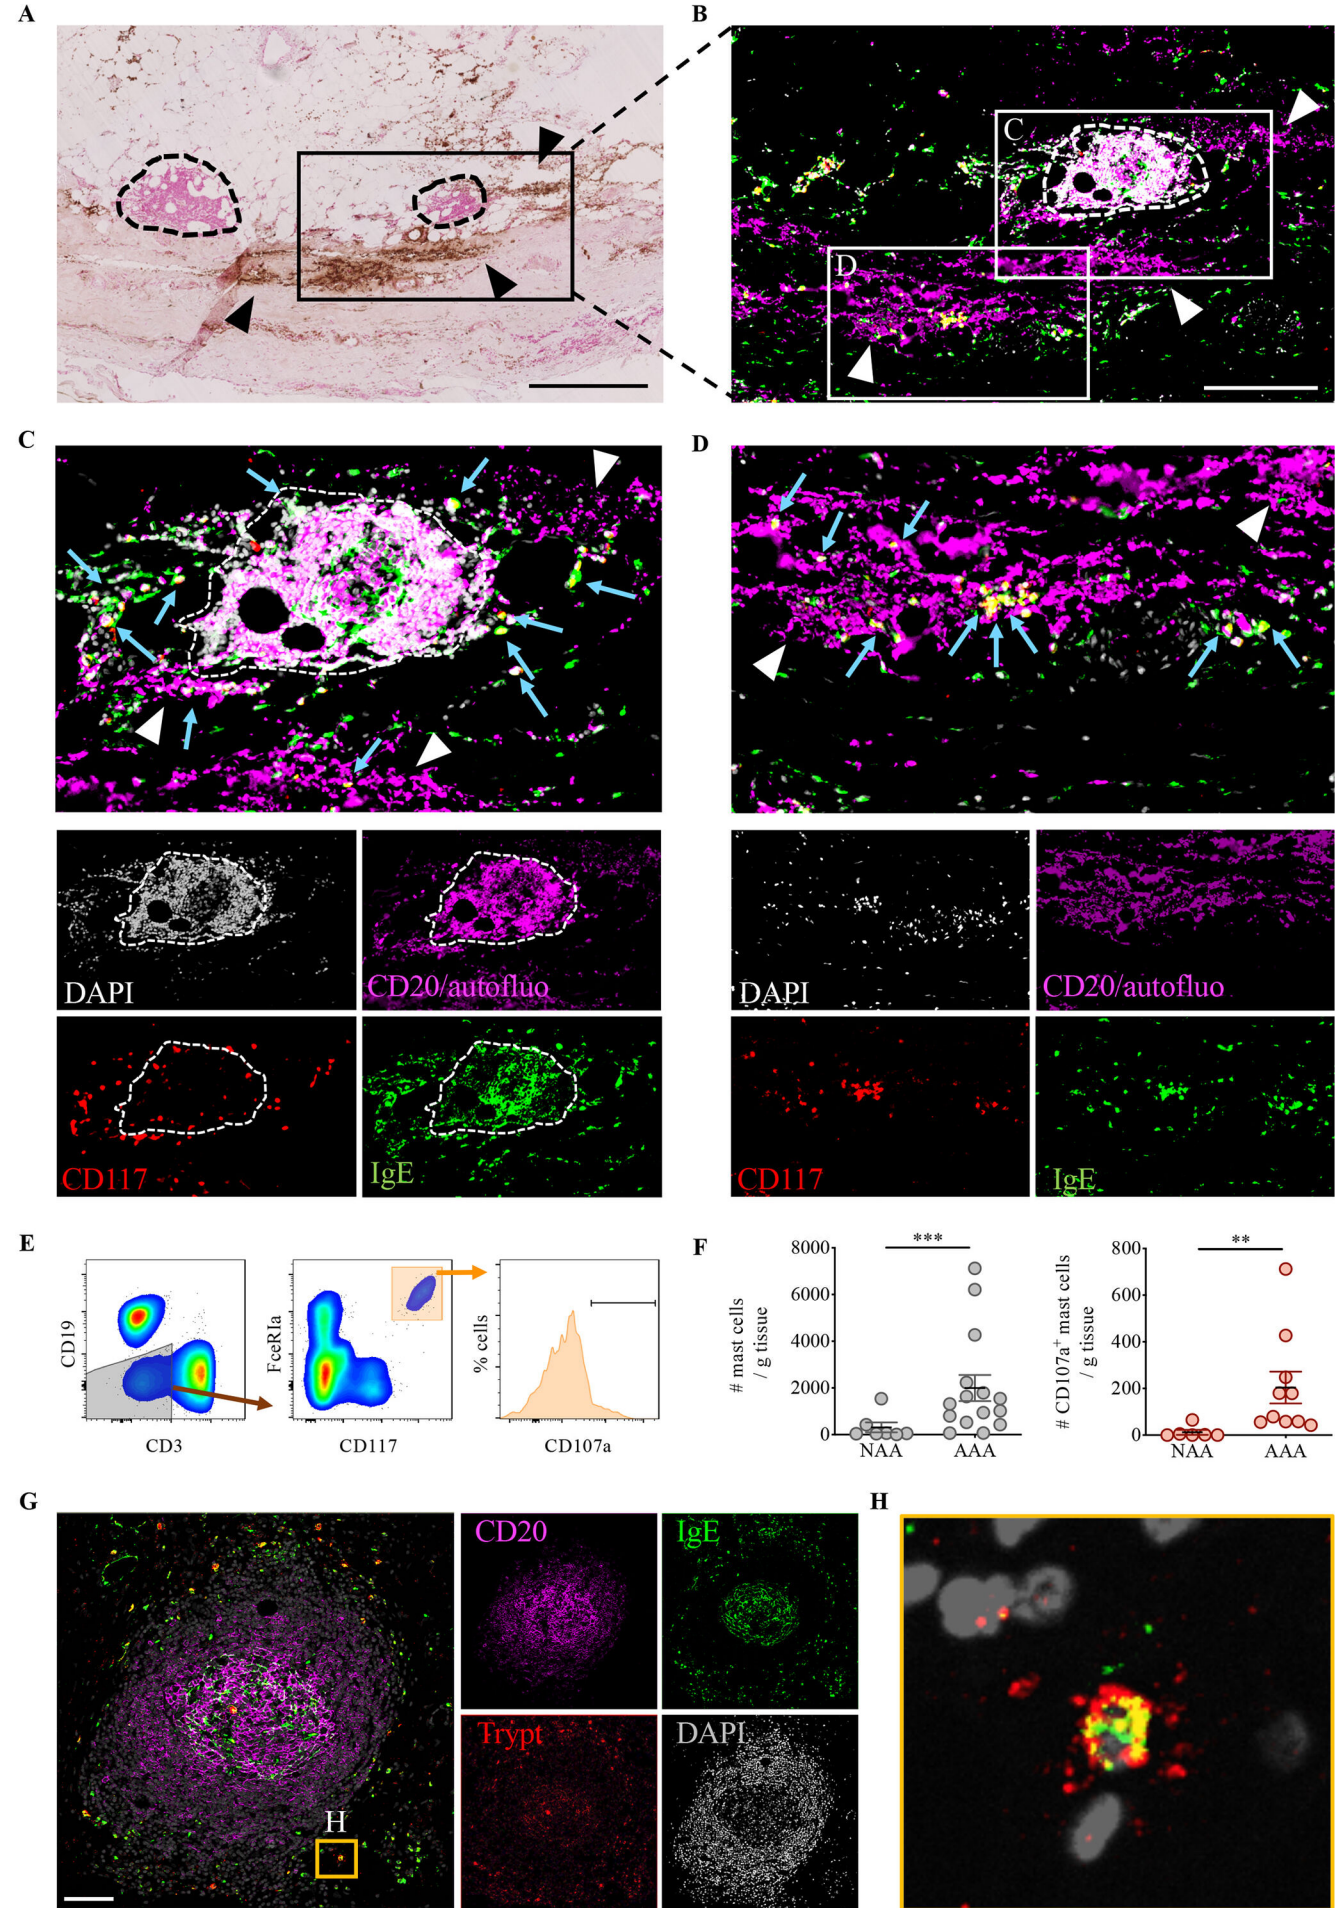

**Figure 2**

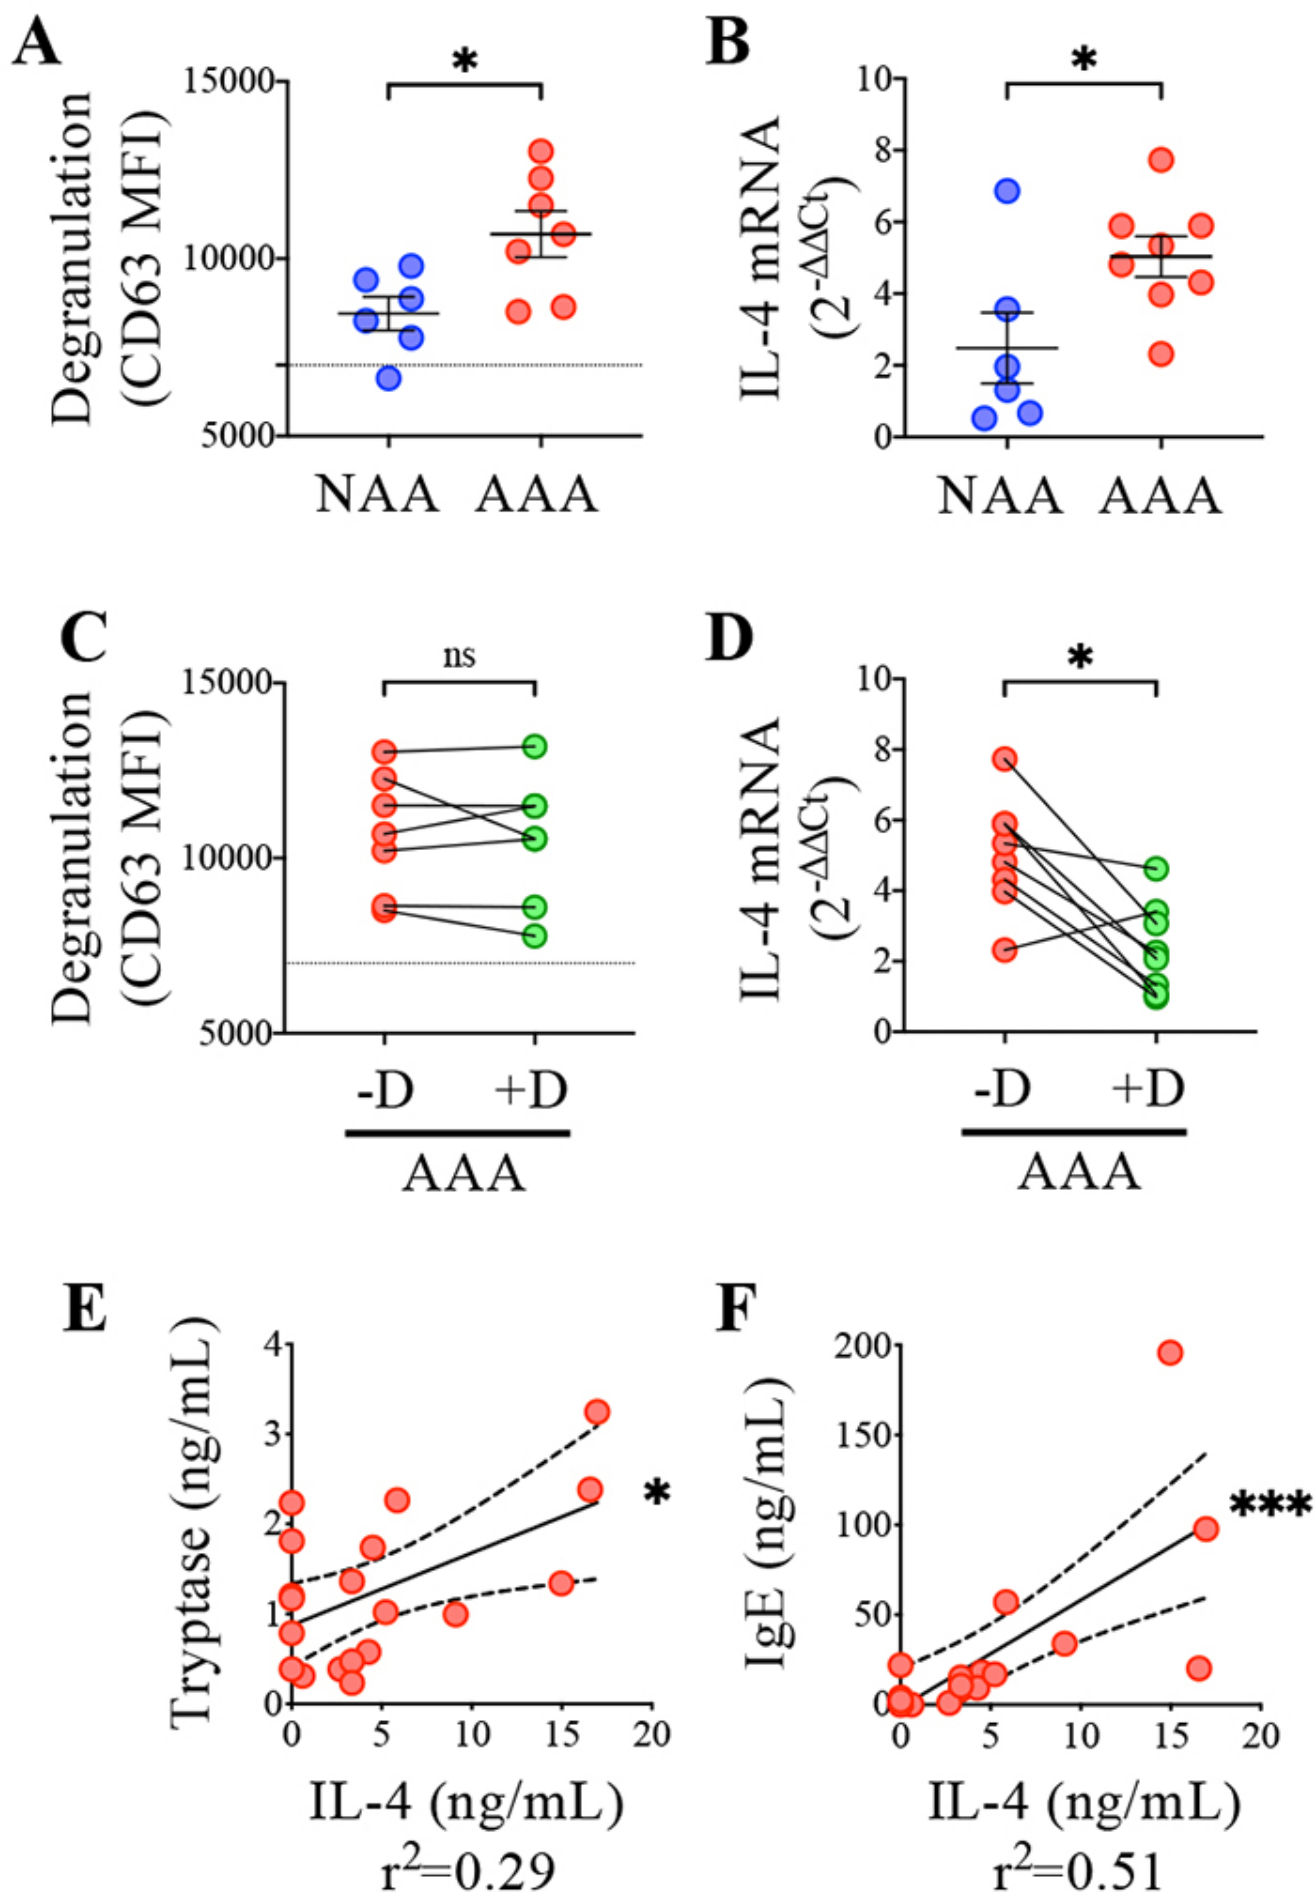

**Figure 3**



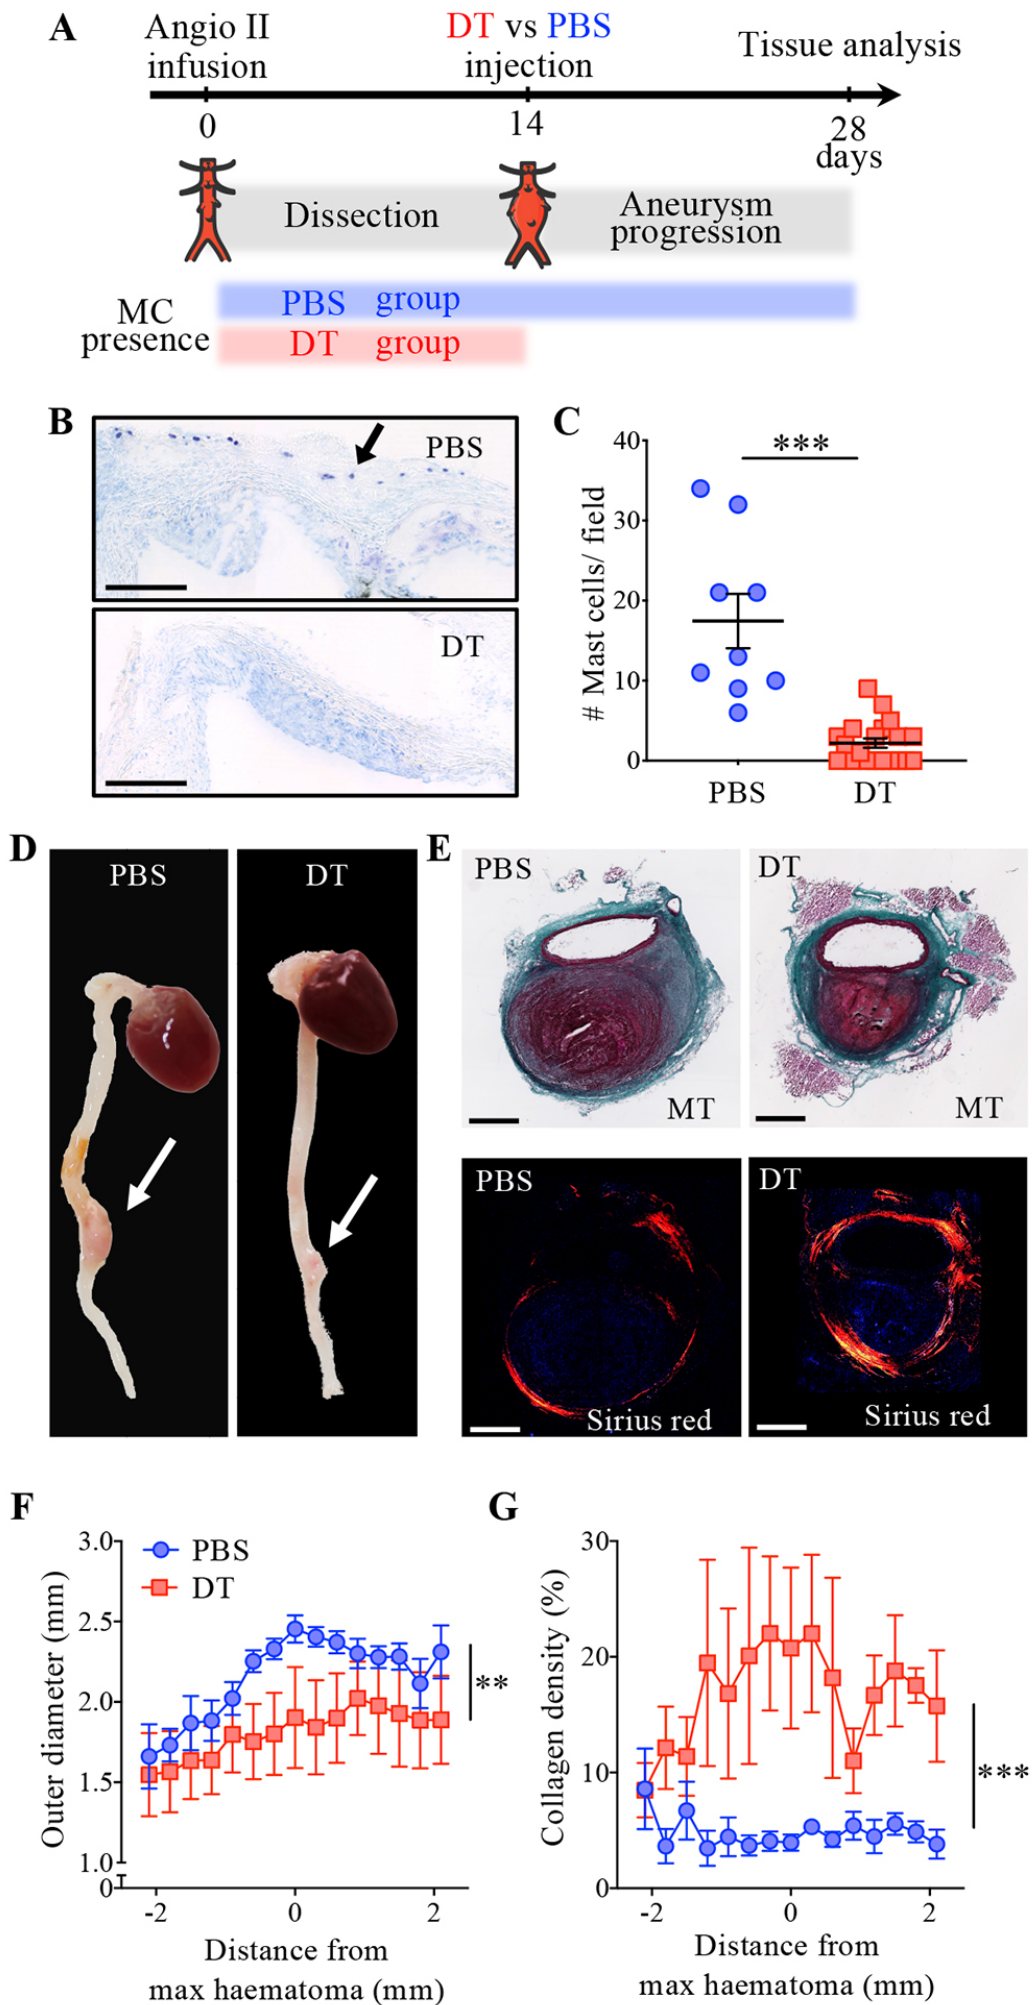

**Figure 4**





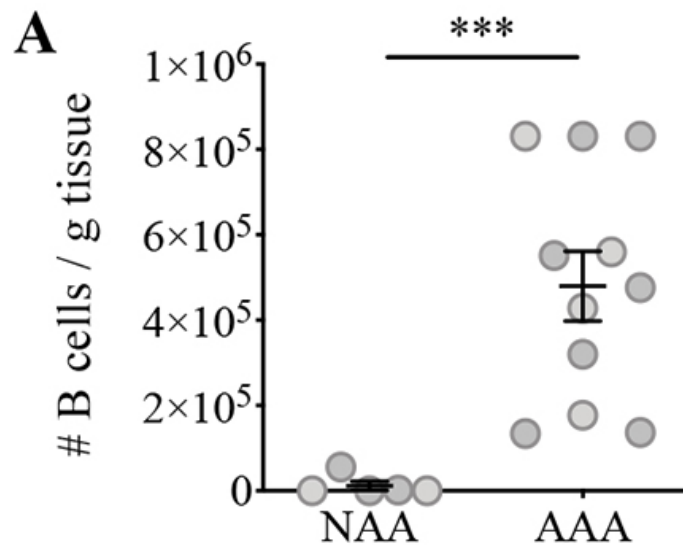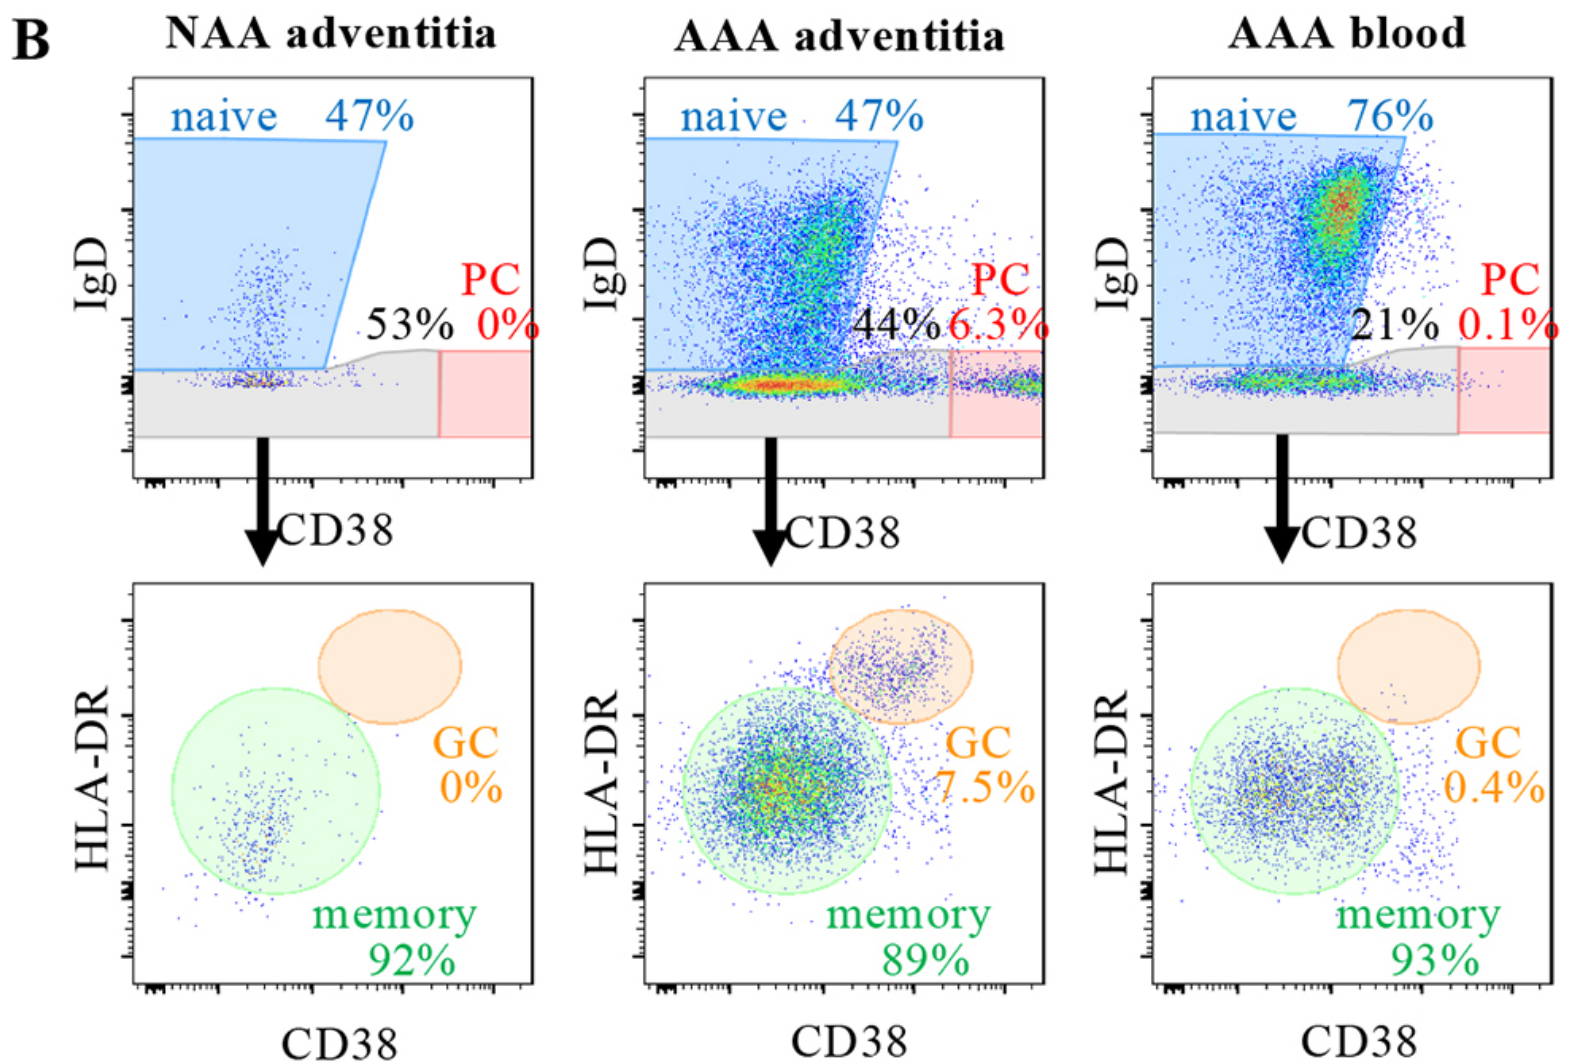

**Figure 1-figure supplement 2**

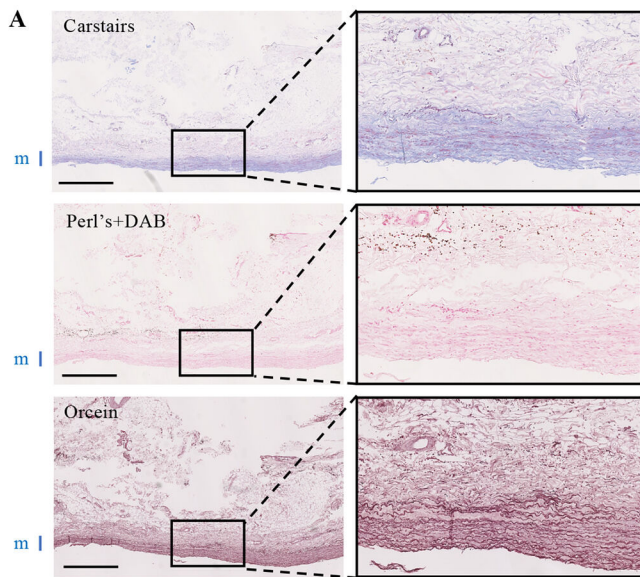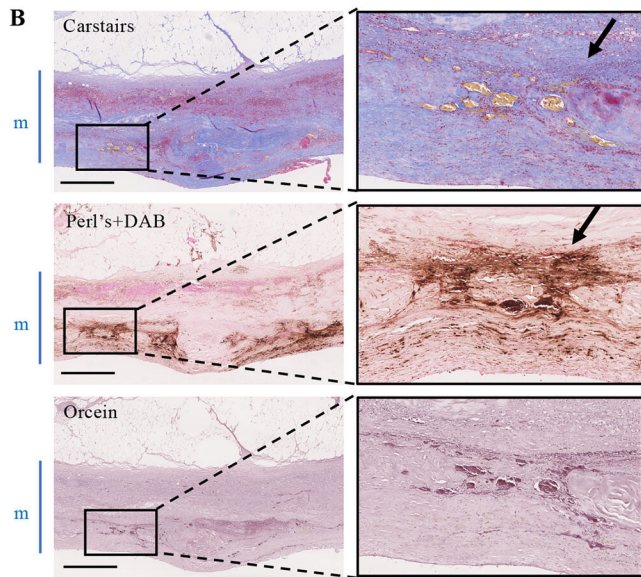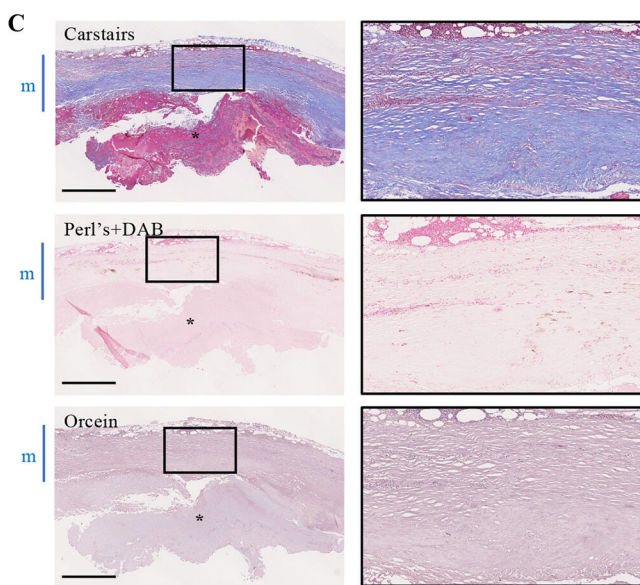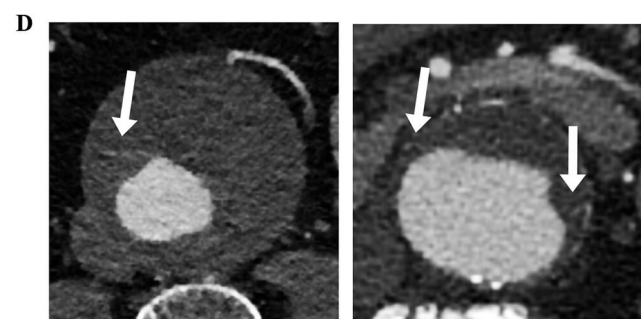

**Figure 1-figure supplement 3**

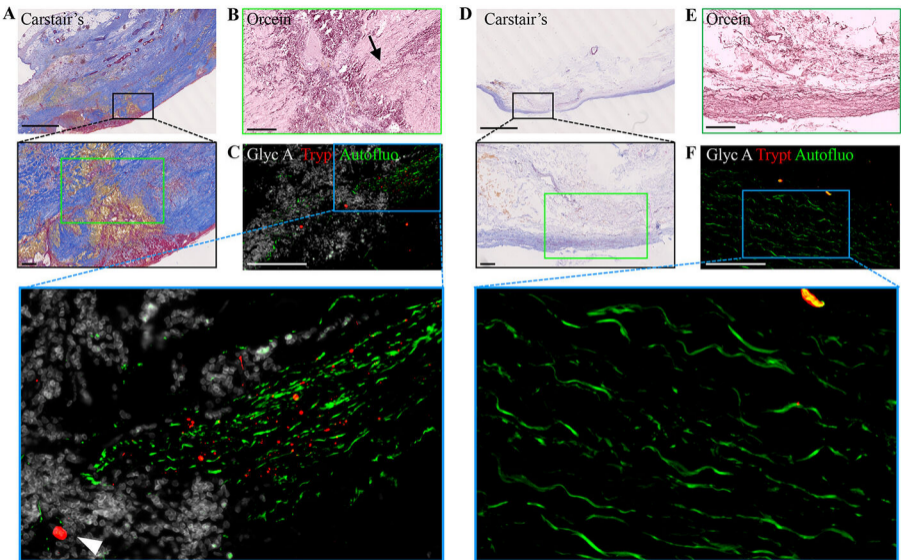

**Figure 1-figure supplement 4**

**A**

Adv.

media

Thrombus

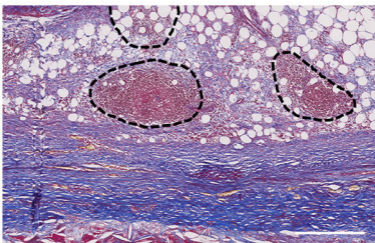**B**

Adv.

media

Thrombus

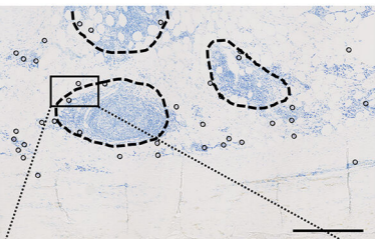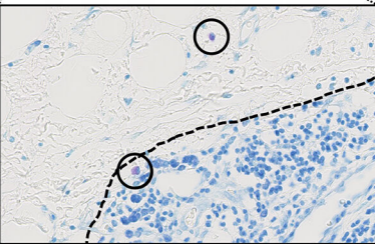**Figure 2-figure supplement 1**

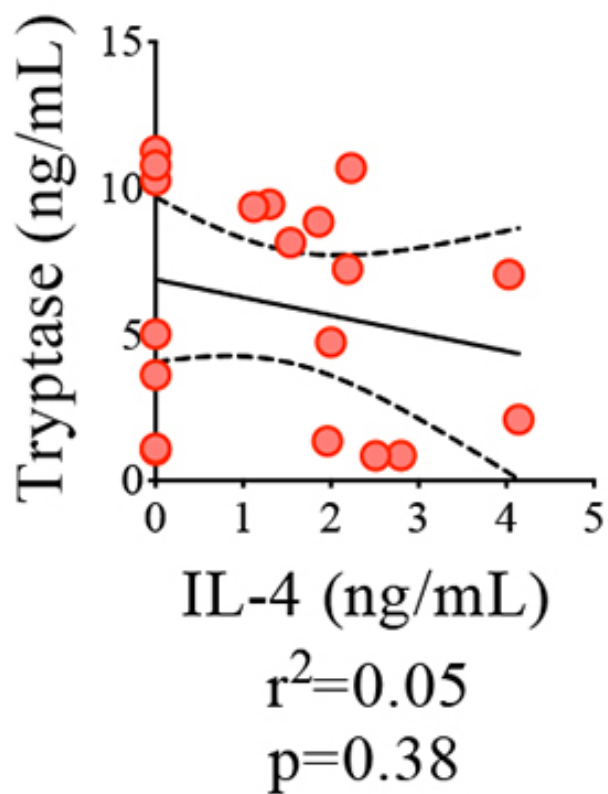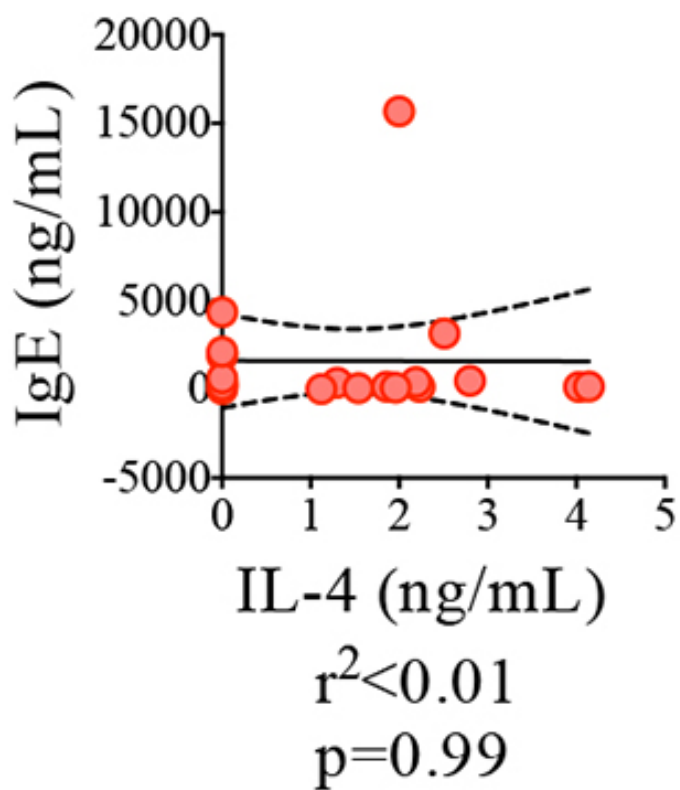

**Figure 3-figure supplement 1**



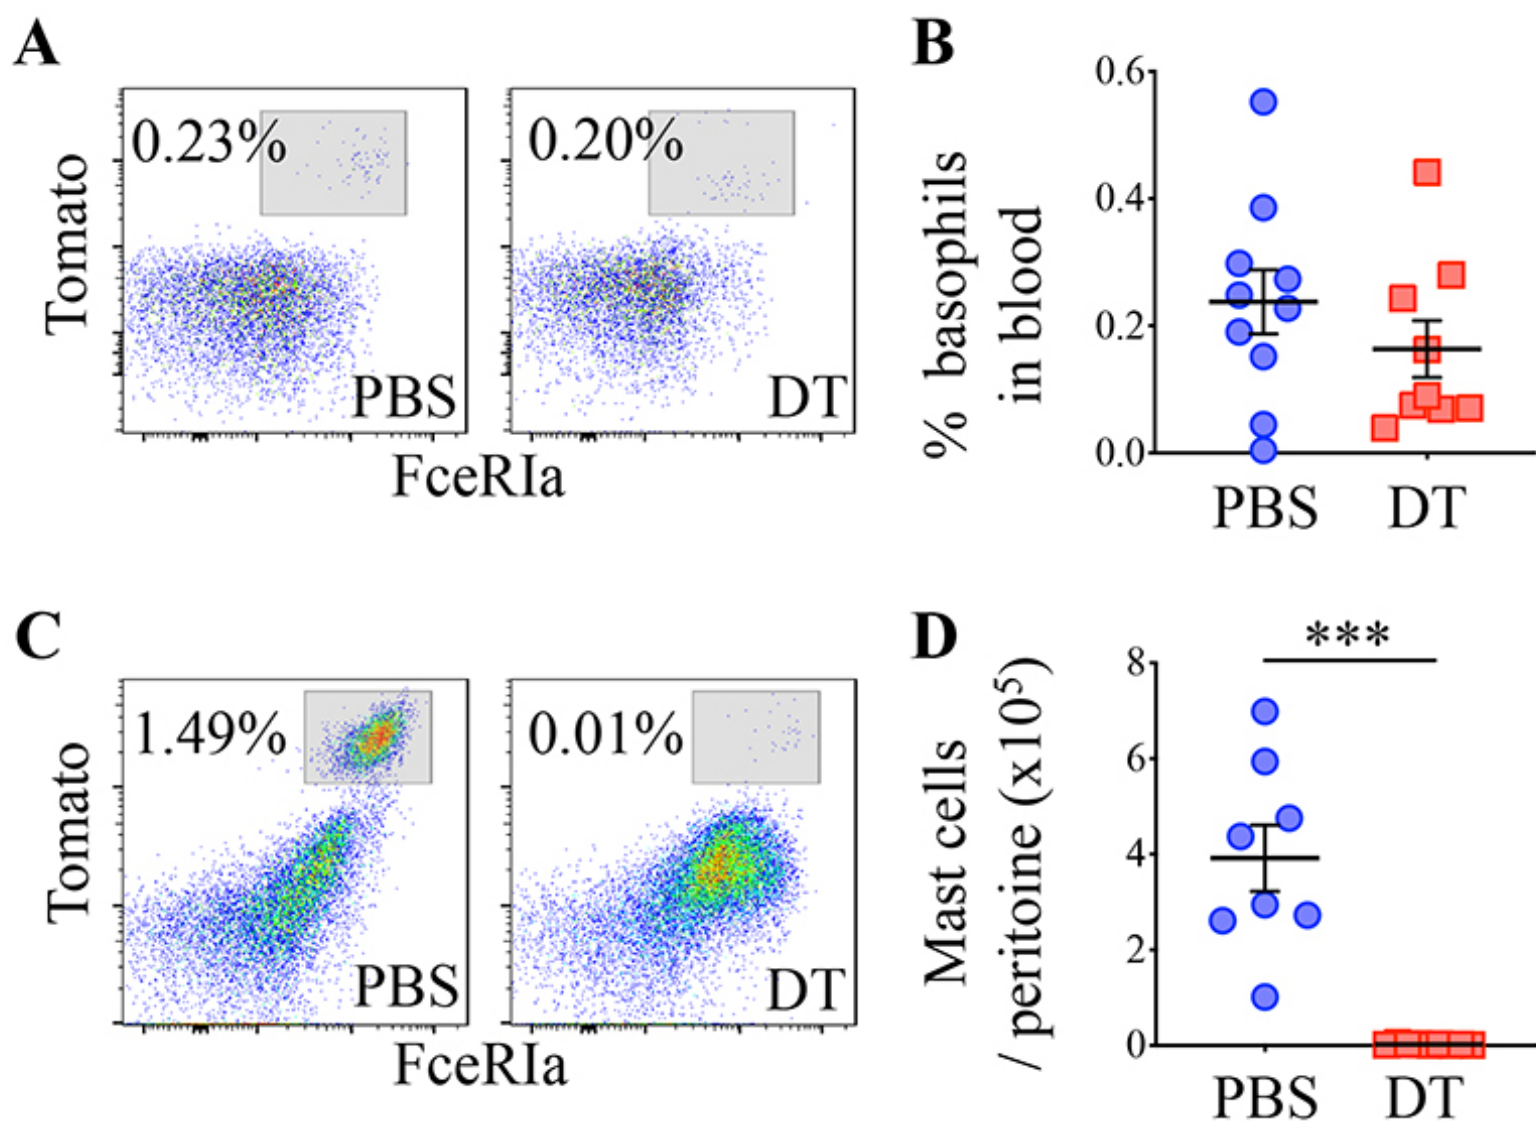

**Figure 4-figure supplement 1**

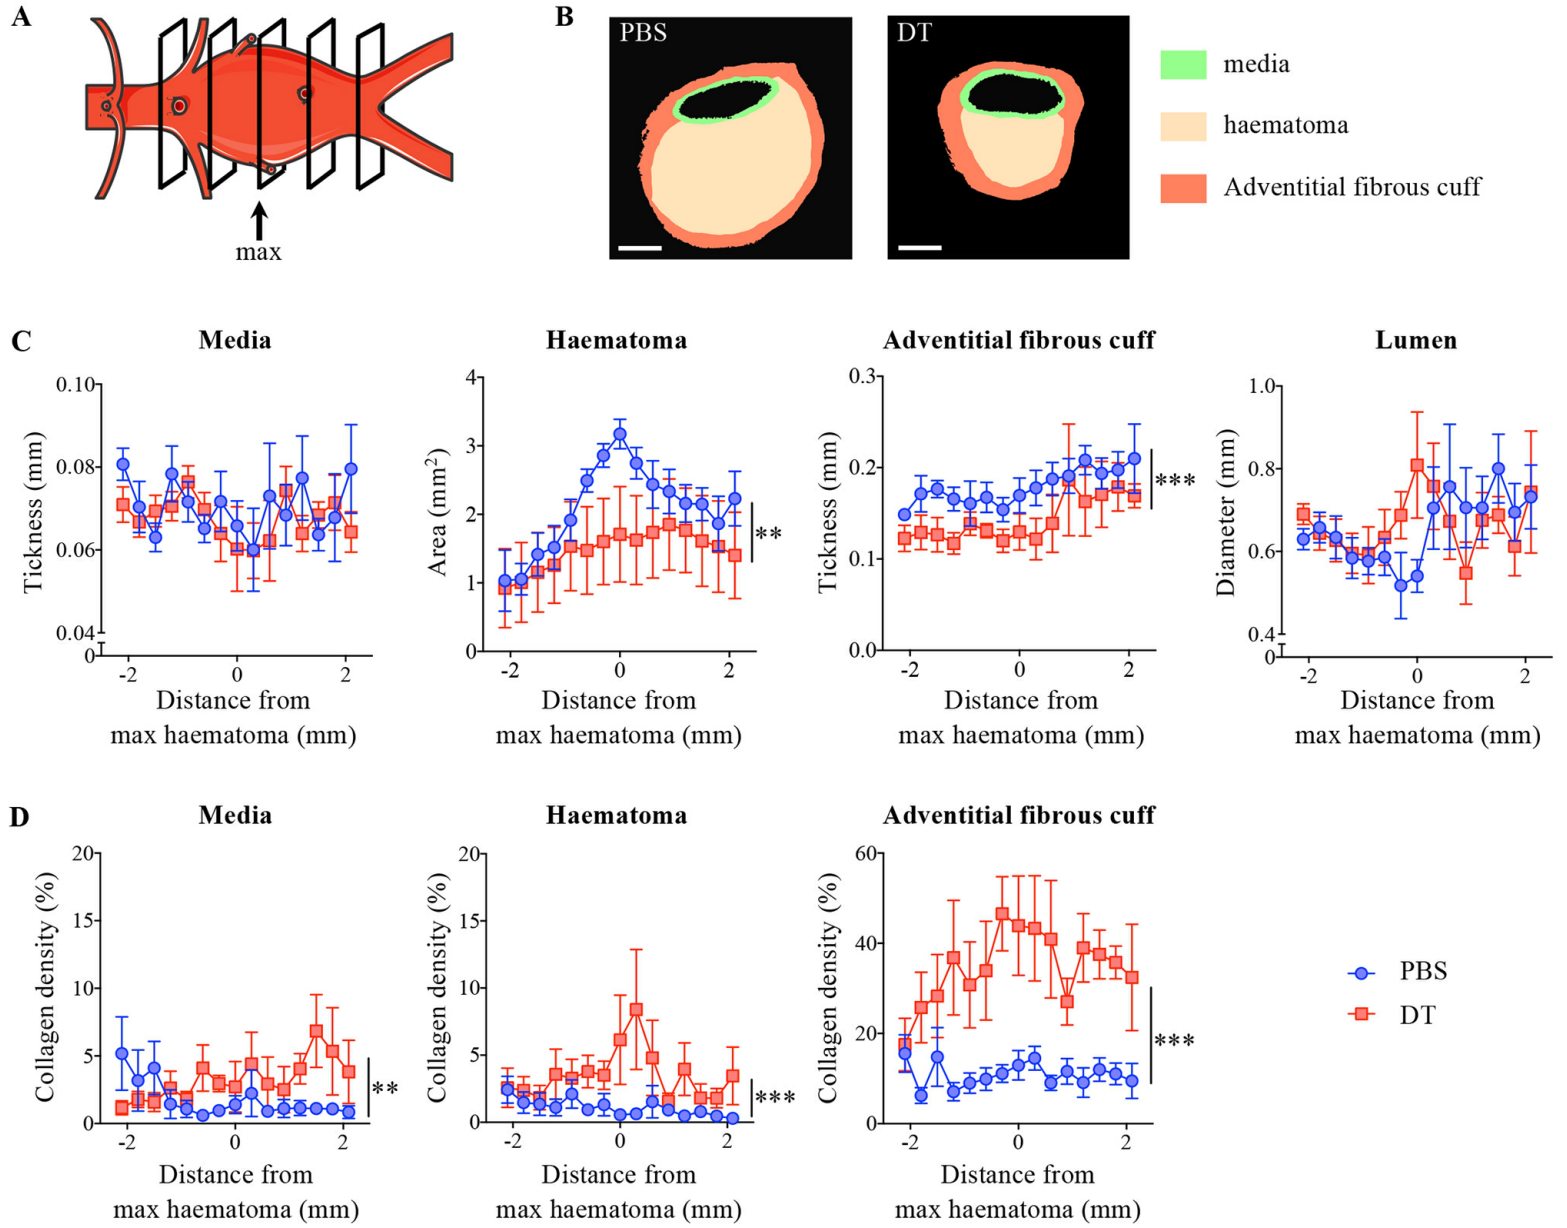

**Figure 4-figure supplement 2**
